# Supplementary material for: A new type of ferrocene-based phosphine-tert-butylsulfinamide ligand: synthesis and application in asymmetric catalysis
Source: Royal Society of Chemistry journal article supplement (doi:10.1039/c5ra03010b), 2015-01-01
Supplement: c5ra03010b1.pdf [file c5ra03010b1.pdf]

## Supporting Information

A new type of ferrocene-based phosphine-tert-butylsulfinamide ligands:  
synthesis and application in asymmetric catalysis

Jiangwei Ma, Chuang Li, Dongxu Zhang, Yang Lei, Muqiong Li, Ru Jiang\* and  
Weiping Chen\*

School of Pharmacy, Fourth Military Medical University, 169 Changle West Road,  
Xi'an, 710032, PR China.

E-mail: jiangru@fmmu.edu.cn; wpchen@fmmu.edu.cn

### Table of Contents

|                                                                                  |     |
|----------------------------------------------------------------------------------|-----|
| General Information.....                                                         | S2  |
| General procedure for synthesis of chiral ligands <b>4a-g</b> .....              | S2  |
| General procedure for the palladium-catalyzed asymmetric allylic alkylation..... | S4  |
| General procedure for the palladium-catalyzed asymmetric allylic amination ..... | S5  |
| NMR and HRMS spectra for chiral ligands <b>4a-g</b> .....                        | S5  |
| NMR spectra and HPLC analysis of products.....                                   | S16 |
| References.....                                                                  | S40 |

## General Information

All commercially obtained reagents and solvents were used without further purification. Compounds **6**, **7** were prepared according to published procedures. <sup>[1]</sup> NMR spectra were recorded on Bruker 400 spectrometer. <sup>1</sup>H NMR, <sup>13</sup>C NMR spectra were measured at 400 MHz and 100 MHz in CDCl<sub>3</sub>. Data for <sup>1</sup>H NMR spectra are reported as follows: chemical shift (ppm, referenced to TMS; s = singlet, d = doublet, t = triplet, dd = doublet of doublets, dt = doublet of triplets, m = multiplet), coupling constant (Hz), and integration. Data for <sup>13</sup>C NMR are reported in terms of chemical shift (ppm) relative to residual solvent peak (CDCl<sub>3</sub>: 77.0 ppm) with complete proton decoupling. <sup>31</sup>P NMR shifts are referenced to 85% H<sub>3</sub>PO<sub>4</sub> as an external standard. Coupling constants are reported in Hz. High-Resolution Mass Spectroscopy (HRMS) was carried out on a VARIA FT-ICR MS. High performance liquid chromatography (HPLC) was performed on an Agilent 1260 series using Daicel Chiralcel chiral column. Optical rotations were obtained on a Perkin-Elmer 343 polarimeter.

## General procedure for synthesis of chiral ligands **4a-g**

To a solution of amine **7** (1 g, 2.4 mmol) in dry THF (5 mL) was added *n*-BuLi (1 mL, 2.4 mmol, 2.4 M) at -30 °C under an N<sub>2</sub> atmosphere, and the mixture was stirred for 10 min. A solution of enantiopure *tert*-butanethiosulfinate (0.47 g, 2.4 mmol) in 1 mL of dry THF was added slowly to the lithium amine solution. Then the mixture was stirred for 2 h at -30 °C, and then ice water were carefully added. The volatile material was removed, and the residue was extracted with CH<sub>2</sub>Cl<sub>2</sub> (3 × 20 mL). The combined organic layers were dried (Na<sub>2</sub>SO<sub>4</sub>), concentrated and purified by flash chromatography (petroleum ether/ethyl acetate 4:1) to afford the chiral sulfinamide-phosphine **4a-g**.

**(*R<sub>C</sub>*,*S<sub>FC</sub>*,*R<sub>S</sub>*)-4a**: Yellow amorphous solid, 45% yield. [ $\alpha$ ]<sub>D</sub><sup>25</sup> = -356.9 (*c* 0.54, CH<sub>2</sub>Cl<sub>2</sub>); m.p. 185-187 °C; <sup>1</sup>H NMR (400 MHz, CDCl<sub>3</sub>):  $\delta$  7.49-7.45 (m, 2H), 7.42-7.37 (m, 3H), 7.35-7.22 (m, 5H), 4.60 (q, 1H), 4.45 (s, 1H), 4.31 (dd, *J* = 4.0, 4.3 Hz, 1H), 4.10 (s, 5H), 3.89 (s, 1H), 3.71 (s, 1H), 1.34 (d, *J* = 4.0 Hz, 3H), 1.06 (s, 9H); <sup>13</sup>C NMR (100 MHz, CDCl<sub>3</sub>)  $\delta$  139.28 (d, <sup>1</sup>*J*<sub>C-P</sub> = 10.9 Hz, PPh<sub>2</sub>, Ph-*ipso*), 137.16 (d, <sup>1</sup>*J*<sub>C-P</sub>

= 10.6 Hz, PPh<sub>2</sub>, Ph-*ipso*), 134.84 (d, <sup>2</sup>J<sub>C-P</sub> = 21.3 Hz, PPh<sub>2</sub>, Ph-*ortho*), 133.06 (d, <sup>2</sup>J<sub>C-P</sub> = 19.1 Hz, PPh<sub>2</sub>, Ph-*ortho*), 129.06 (s, PPh<sub>2</sub>, Ph-*para*), 128.37 (s, PPh<sub>2</sub>, Ph-*para*), 128.34 (d, <sup>3</sup>J<sub>C-P</sub> = 6.7 Hz, PPh<sub>2</sub>, Ph-*meta*), 128.09 (d, <sup>3</sup>J<sub>C-P</sub> = 7.6 Hz, PPh<sub>2</sub>, Ph-*meta*), 96.44 (d, <sup>1</sup>J<sub>C-P</sub> = 22.0 Hz, Fc, C-1), 74.38 (d, <sup>2</sup>J<sub>C-P</sub> = 12.3 Hz, Fc, C-5), 71.98 (d, <sup>2</sup>J<sub>C-P</sub> = 4.0 Hz, Fc, C-2), 70.75 (d, <sup>3</sup>J<sub>C-P</sub> = 4.1 Hz, Fc, C-4), 69.88 (s, Fc, Cp'), 69.36 (s, Fc, C-3), 55.18 (s, C(CH<sub>3</sub>)<sub>3</sub>), 48.65 (d, J = 3.9 Hz, CHN), 22.45 (d, J = 1.1 Hz, C(CH<sub>3</sub>)<sub>3</sub>), 21.57 (s, NCHCH<sub>3</sub>); <sup>31</sup>P NMR (162 MHz, CDCl<sub>3</sub>): δ -24.57; HRMS *m/z* calcd for C<sub>28</sub>H<sub>32</sub>FeNOPS [M+H]<sup>+</sup> 518.1364, found 518.1365.

**(R<sub>C</sub>,S<sub>Fe</sub>,R<sub>S</sub>)-4b**: Yellow amorphous solid, 66% yield. [α]<sub>D</sub><sup>25</sup> = -343.0 (c 0.64, CH<sub>2</sub>Cl<sub>2</sub>); m.p. 161-163 °C; <sup>1</sup>H NMR (400 MHz, CDCl<sub>3</sub>): δ 7.70-7.60 (m, 2H), 7.37-7.34 (m, 5H), 7.26-7.23 (m, 3H), 4.52 (s, 1H), 4.45-4.36 (m, 1H), 4.34 (s, 1H), 4.04 (s, 1H), 3.94 (s, 5H), 2.37 (s, 3H), 1.83 (d, J = 7.0 Hz, 3H), 0.77 (s, 9H); <sup>13</sup>C NMR (100 MHz, CDCl<sub>3</sub>): δ 139.05 (d, <sup>1</sup>J<sub>C-P</sub> = 8.6 Hz, PPh<sub>2</sub>, Ph-*ipso*), 137.52 (d, <sup>1</sup>J<sub>C-P</sub> = 7.8 Hz, PPh<sub>2</sub>, Ph-*ipso*), 135.04 (d, <sup>2</sup>J<sub>C-P</sub> = 22.0 Hz, PPh<sub>2</sub>, Ph-*ortho*), 133.13 (d, <sup>2</sup>J<sub>C-P</sub> = 19.8 Hz, PPh<sub>2</sub>, Ph-*ortho*), 129.14 (s, PPh<sub>2</sub>, Ph-*para*), 128.18 (d, <sup>3</sup>J<sub>C-P</sub> = 6.5 Hz, PPh<sub>2</sub>, Ph-*meta*), 128.06 (s, PPh<sub>2</sub>, Ph-*para*), 127.98 (d, <sup>3</sup>J<sub>C-P</sub> = 6.9 Hz, PPh<sub>2</sub>, Ph-*meta*), 97.09 (d, <sup>1</sup>J<sub>C-P</sub> = 26.7 Hz, Fc, C-1), 74.57 (d, <sup>2</sup>J<sub>C-P</sub> = 9.3 Hz, Fc, C-5), 71.44 (d, <sup>2</sup>J<sub>C-P</sub> = 4.6 Hz, Fc, C-2), 69.85 (overlapped, Fc, C-4), 69.78 (s, Fc, Cp'), 69.27 (s, Fc, C-4), 57.85 (d, J = 11.6 Hz, CHN), 57.51 (s, C(CH<sub>3</sub>)<sub>3</sub>), 30.33 (s, NCH<sub>3</sub>), 23.50 (s, C(CH<sub>3</sub>)<sub>3</sub>), 18.42 (d, J = 1.9 Hz, NCHCH<sub>3</sub>); <sup>31</sup>P NMR (162 MHz, CDCl<sub>3</sub>): δ -25.36; HRMS *m/z* calcd for C<sub>29</sub>H<sub>34</sub>FeNOPS [M+H]<sup>+</sup> 532.1521, found 532.1520

**(R<sub>C</sub>,S<sub>Fe</sub>,R<sub>S</sub>)-4c**: Yellow amorphous solid, 12% yield. [α]<sub>D</sub><sup>25</sup> = -294.5 (c 0.56, CH<sub>2</sub>Cl<sub>2</sub>); m.p. 172-174 °C; <sup>1</sup>H NMR (400 MHz, CDCl<sub>3</sub>): δ 7.10-6.80 (m, 6H), 4.59 (d, J = 6.4 Hz, 1H), 4.42 (s, 1H), 4.28 (s, 1H), 4.09 (s, 4H), 3.95 (s, 1H), 3.70 (s, 1H), 2.31 (s, 6H), 2.20 (s, 6H), 1.34 (d, J = 6.5 Hz, 3H), 1.05 (s, 9H); <sup>13</sup>C NMR (100 MHz, CDCl<sub>3</sub>): δ 138.86 (d, <sup>1</sup>J<sub>C-P</sub> = 10.1 Hz, PAr<sub>2</sub>, Ar-*ipso*), 137.51 (d, <sup>3</sup>J<sub>C-P</sub> = 6.9 Hz, PAr<sub>2</sub>, Ar-*meta*), 137.37 (d, <sup>3</sup>J<sub>C-P</sub> = 7.9 Hz, PAr<sub>2</sub>, Ar-*meta*), 136.95 (d, <sup>1</sup>J<sub>C-P</sub> = 10.2 Hz, PAr<sub>2</sub>, Ar-*ipso*), 132.55 (d, <sup>2</sup>J<sub>C-P</sub> = 21.2 Hz, PAr<sub>2</sub>, Ar-*ortho*), 130.83 (d, <sup>2</sup>J<sub>C-P</sub> = 19.0 Hz, PAr<sub>2</sub>, Ar-*ortho*), 130.74 (s, PAr<sub>2</sub>, Ar-*para*), 130.11 (s, PAr<sub>2</sub>, Ar-*para*), 96.35 (d, <sup>1</sup>J<sub>C-P</sub> = 21.8 Hz, Fc, C-1), 74.93 (d, <sup>2</sup>J<sub>C-P</sub> = 12.6 Hz, Fc, C-5), 72.06 (d, <sup>2</sup>J<sub>C-P</sub> = 3.8 Hz, Fc, C-2), 70.47

(d,  $^3J_{C-P} = 4.1$  Hz, Fc, C-4), 69.83 (s, Fc, Cp'), 69.09 (s, Fc, C-3), 55.11 (s,  $\underline{C}(\text{CH}_3)_3$ ), 48.71 (d,  $J = 3.8$  Hz,  $\underline{\text{CHN}}$ ), 22.45 (s,  $\text{C}(\underline{\text{CH}_3})_3$ ), 21.37 (s,  $\text{NCH}\underline{\text{CH}_3}$ ), 21.30 (s,  $\text{PAr}_2$ , *meta*- $\text{CH}_3$ );  $^{31}\text{P}$  NMR (162 MHz,  $\text{CDCl}_3$ ):  $\delta$  -24.27; HRMS  $m/z$  calcd for  $\text{C}_{32}\text{H}_{40}\text{FeNOPS}$   $[\text{M}+\text{H}]^+$  574.1990, found 574.1993.

**( $R_C, S_{Fc}, R_S$ )-4d:** Yellow amorphous solid, 48% yield.  $[\alpha]_{\text{D}}^{25} = -208.2$  ( $c$  0.54,  $\text{CH}_2\text{Cl}_2$ ); m.p. 91-93 °C;  $^1\text{H}$  NMR (400 MHz,  $\text{CDCl}_3$ ):  $\delta$  7.37-7.10 (m, 6H), 4.60 (d,  $J = 6.4$  Hz, 1H), 4.40 (s, 1H), 4.26 (s, 1H), 4.10 (s, 5H), 3.99 (s, 1H), 3.64 (s, 1H), 1.27 (s, 18H), 1.20 (s, 18H), 1.03 (s, 9H);  $^{13}\text{C}$  NMR (100 MHz,  $\text{CDCl}_3$ ):  $\delta$  150.19 (d,  $^3J_{C-P} = 6.6$  Hz,  $\text{PAr}_2$ , *Ar-meta*), 149.98 (d,  $^3J_{C-P} = 7.3$  Hz,  $\text{PAr}_2$ , *Ar-meta*), 137.84 (d,  $^1J_{C-P} = 8.8$  Hz,  $\text{PAr}_2$ , *Ar-ipso*), 136.01 (d,  $^1J_{C-P} = 9.5$  Hz,  $\text{PAr}_2$ , *Ar-ipso*), 129.03 (d,  $^2J_{C-P} = 21.5$  Hz,  $\text{PAr}_2$ , *Ar-ortho*), 127.75 (d,  $^2J_{C-P} = 19.9$  Hz,  $\text{PAr}_2$ , *Ar-ortho*), 122.73 (s,  $\text{PAr}_2$ , *Ar-para*), 122.36 (s,  $\text{PAr}_2$ , *Ar-para*), 95.84 (d,  $^1J_{C-P} = 20.8$  Hz, Fc, C-1), 76.21 (d,  $^2J_{C-P} = 12.8$  Hz, Fc, C-5), 71.81 (d,  $^2J_{C-P} = 4.0$  Hz, Fc, C-2), 70.45 (d,  $^3J_{C-P} = 3.8$  Hz, Fc, C-4), 69.73 (s, Fc, Cp'), 68.90 (s, Fc, C-3), 55.03 (s,  $\text{SC}(\underline{\text{CH}_3})_3$ ), 48.67 (d,  $J = 3.8$  Hz,  $\underline{\text{CHN}}$ ), 34.86 (s,  $\text{PAr}_2$ ,  $\underline{\text{C}}(\text{CH}_3)_3$ ), 34.79 (s,  $\text{PAr}_2$ ,  $\underline{\text{C}}(\text{CH}_3)_3$ ), 31.46 (s,  $\text{PAr}_2$ ,  $\text{C}(\underline{\text{CH}_3})_3$ ), 31.40 (s,  $\text{PAr}_2$ , *meta*- $\text{C}(\underline{\text{CH}_3})_3$ ), 22.52 (s,  $\text{SC}(\underline{\text{CH}_3})_3$ ), 21.23 (s,  $\text{NCH}\underline{\text{CH}_3}$ );  $^{31}\text{P}$  NMR (162 MHz,  $\text{CDCl}_3$ )  $\delta$  -23.82; HRMS  $m/z$  calcd for  $\text{C}_{44}\text{H}_{64}\text{FeNOPS}$   $[\text{M}+\text{H}]^+$  742.3868, found 742.3882.

**( $R_C, S_{Fc}, R_S$ )-4e:** Yellow oil, 48% yield.  $[\alpha]_{\text{D}}^{25} = -204.3$  ( $c$  0.8  $\text{CH}_2\text{Cl}_2$ );  $^1\text{H}$  NMR (400 MHz,  $\text{CDCl}_3$ ):  $\delta$  4.54 (q,  $J = 6.4$  Hz, 1H), 4.33 (s, 1H), 4.27 (s, 1H), 4.18 (s, 5H), 4.12 (s, 1H), 1.80-1.76 (m, 2H), 1.63-1.48 (m, 9H), 1.25-1.21 (m, 13H), 0.99 (t,  $J = 6.8$  Hz, 3H), 0.82 (t,  $J = 6.8$  Hz, 3H);  $^{13}\text{C}$  NMR (100 MHz,  $\text{CDCl}_3$ ):  $\delta$  96.06 (d,  $^1J_{C-P} = 19.1$  Hz, Fc, C-1), 76.08 (d,  $^2J_{C-P} = 18.1$  Hz, Fc, C-5), 70.70 (d,  $^2J_{C-P} = 19.8$  Hz, Fc, C-2), 69.73 (s, Fc, Cp'), 69.56 (d,  $^3J_{C-P} = 3.1$  Hz, Fc, C-4), 68.75 (s, Fc, C-3), 55.43 (s,  $\text{SC}(\underline{\text{CH}_3})_3$ ), 49.25 (s,  $\underline{\text{CHN}}$ ), 29.10 (d,  $J = 19.1$  Hz,  $\text{PCH}_2\text{CH}_2\text{CH}_2\text{CH}_3$ ), 28.85 (d,  $J = 13.5$  Hz,  $\text{PCH}_2\text{CH}_2\text{CH}_2\text{CH}_3$ ), 27.40 (d,  $J = 6.9$  Hz,  $\text{PCH}_2\text{CH}_2\text{CH}_2\text{CH}_3$ ), 25.22 (d,  $J = 10.0$  Hz,  $\text{PCH}_2\text{CH}_2\text{CH}_2\text{CH}_3$ ), 24.58 (d,  $J = 13.3$  Hz,  $\text{PCH}_2\text{CH}_2\text{CH}_2\text{CH}_3$ ), 24.41 (d,  $J = 8.3$  Hz,  $\text{PCH}_2\text{CH}_2\text{CH}_2\text{CH}_3$ ), 23.68 (s,  $\text{NCH}\underline{\text{CH}_3}$ ), 22.71 (d,  $J = 1.6$  Hz,  $\text{SC}(\underline{\text{CH}_3})_3$ ), 13.98 (s,  $\text{PCH}_2\text{CH}_2\text{CH}_2\text{CH}_3$ ), 13.80 (s,  $\text{PCH}_2\text{CH}_2\text{CH}_2\text{CH}_3$ );  $^{31}\text{P}$  NMR (162 MHz,  $\text{CDCl}_3$ ):  $\delta$  -39.65; HRMS  $m/z$  calcd for  $\text{C}_{24}\text{H}_{40}\text{FeNOPS}$   $[\text{M}+\text{H}]^+$  478.1990, found

478.1980

**(*R<sub>C</sub>*,*S<sub>Fc</sub>*,*S<sub>S</sub>*)-4f**: Yellow amorphous solid, 50% yield.  $[\alpha]_D^{25} = -304.0$  (*c* 0.58, CH<sub>2</sub>Cl<sub>2</sub>); m.p. 147-148 °C; <sup>1</sup>H NMR (400 MHz, CDCl<sub>3</sub>): δ 7.57-7.53 (m, 2H), 7.38-7.37 (m, 3H), 7.20 (q, *J* = 5.6 Hz, 3H), 7.15-7.11 (m, 2H), 4.69-4.63 (m, 1H), 4.51 (s, 1H), 4.36 (t, *J* = 2.3 Hz, 1H), 3.94 (s, 5H), 3.01 (d, *J* = 8.4 Hz, 1H), 1.77 (d, *J* = 6.7 Hz, 3H), 0.82 (s, 9H); <sup>13</sup>C NMR (100 MHz, CDCl<sub>3</sub>): δ 140.37 (d, <sup>1</sup>*J*<sub>C-P</sub> = 8.2 Hz, PPh<sub>2</sub>, Ph-*ipso*), 137.72 (d, <sup>1</sup>*J*<sub>C-P</sub> = 8.2 Hz, PPh<sub>2</sub>, Ph-*ipso*), 135.32 (d, <sup>2</sup>*J*<sub>C-P</sub> = 21.7 Hz, PPh<sub>2</sub>, Ph-*ortho*), 132.44 (d, <sup>2</sup>*J*<sub>C-P</sub> = 17.5 Hz, PPh<sub>2</sub>, Ph-*ortho*), 129.27 (s, PPh<sub>2</sub>, Ph-*para*), 128.16 (d, <sup>3</sup>*J*<sub>C-P</sub> = 4.2 Hz, PPh<sub>2</sub>, Ph-*meta*), 128.09 (d, <sup>3</sup>*J*<sub>C-P</sub> = 6.5 Hz, PPh<sub>2</sub>, Ph-*meta*), 127.78 (s, PPh<sub>2</sub>, Ph-*para*), 96.90 (d, <sup>1</sup>*J*<sub>C-P</sub> = 25.7 Hz, Fc, C-1), 74.74 (d, <sup>2</sup>*J*<sub>C-P</sub> = 9.9 Hz, Fc, C-5), 71.89 (d, <sup>2</sup>*J*<sub>C-P</sub> = 4.6 Hz, Fc, C-2), 69.73 (s, Fc, Cp'), 69.71 (s, Fc, C-3), 69.15 (d, <sup>3</sup>*J*<sub>C-P</sub> = 4.5 Hz, Fc, C-4), 55.58 (s, SC(CH<sub>3</sub>)<sub>3</sub>), 51.69 (d, *J* = 8.3 Hz, CHN), 23.01 (s, NCHCH<sub>3</sub>), 22.13 (s, SC(CH<sub>3</sub>)<sub>3</sub>); <sup>31</sup>P NMR (162 MHz, CDCl<sub>3</sub>): δ -25.19; HRMS *m/z* calcd for C<sub>28</sub>H<sub>32</sub>FeNOPS [M+H]<sup>+</sup> 518.1364, found 518.1352.

**(*R<sub>C</sub>*,*S<sub>Fc</sub>*,*S<sub>S</sub>*)-4g**: Yellow amorphous solid, 68% yield.  $[\alpha]_D^{25} = -360.5$  (*c* 0.53 CH<sub>2</sub>Cl<sub>2</sub>); m.p. 67-69°C; <sup>1</sup>H NMR (400 MHz, CDCl<sub>3</sub>): δ 7.57 (d, *J* = 22.1 Hz, 2H), 7.38 (s, 3H), 7.17 (s, 3H), 7.02 (s, 2H), 4.82 (d, *J* = 4.5 Hz, 1H), 4.53 (s, 1H), 4.40 (s, 1H), 4.09 (s, 1H), 4.00 (s, 1H), 3.90 (s, 4H), 2.08 (s, 3H), 1.70 (d, *J* = 6.6 Hz, 3H), 0.81 (s, 9H); <sup>13</sup>C NMR (100 MHz, CDCl<sub>3</sub>): δ 141.19 (d, <sup>1</sup>*J*<sub>C-P</sub> = 8.1 Hz, PPh<sub>2</sub>, Ph-*ipso*), 138.33 (d, <sup>1</sup>*J*<sub>C-P</sub> = 8.4 Hz, PPh<sub>2</sub>, Ph-*ipso*), 135.67 (d, <sup>2</sup>*J*<sub>C-P</sub> = 22.1 Hz, PPh<sub>2</sub>, Ph-*ortho*), 132.05 (d, <sup>2</sup>*J*<sub>C-P</sub> = 16.5 Hz, PPh<sub>2</sub>, Ph-*ortho*), 129.26 (s, PPh<sub>2</sub>, Ph-*para*), 128.02 (d, *J* = 8.3 Hz, PPh<sub>2</sub>, Ph-*meta*), 127.75 (d, *J* = 5.6 Hz, PPh<sub>2</sub>, Ph-*meta*), 127.38 (s, PPh<sub>2</sub>, Ph-*para*), 94.40 (d, <sup>1</sup>*J*<sub>C-P</sub> = 27.3 Hz, Fc, C-1), 75.21 (d, <sup>2</sup>*J*<sub>C-P</sub> = 10.3 Hz, Fc, C-5), 72.20 (d, <sup>2</sup>*J*<sub>C-P</sub> = 4.9 Hz, Fc, C-2), 71.01 (d, <sup>3</sup>*J*<sub>C-P</sub> = 4.6 Hz, Fc, C-4), 70.54 (s, Fc, C-3), 69.85 (s, Fc, Cp'), 58.69 (d, *J* = 7.6 Hz, CHN), 57.79 (s, SC(CH<sub>3</sub>)<sub>3</sub>), 23.94 (s, NCH<sub>3</sub>), 23.45 (d, *J* = 2.5 Hz, SC(CH<sub>3</sub>)<sub>3</sub>), 16.58 (s, NCHCH<sub>3</sub>); <sup>31</sup>P NMR (162 MHz, CDCl<sub>3</sub>): δ -24.90; HRMS *m/z* calcd for C<sub>29</sub>H<sub>34</sub>FeNOPS [M+H]<sup>+</sup> 532.1521, found 532.1515.

## General procedure for the palladium-catalyzed asymmetric allylic alkylation

To a stirring solution of  $[\text{Pd}(\eta^3\text{-C}_3\text{H}_5)\text{Cl}]_2$  (2.9 mg, 0.008 mmol) in THF(1mL) was added ligand **4a** (12.4mg, 0.024 mmol) under an argon atmosphere. After 1 h, substrate **8** (0.396 mmol) was added and the solution was stirred for 15 min. nucleophile **9** (1.19mmol) was added to the mixture followed by BSA (0.29 mL, 1.19 mmol). After 24 h, the reaction was diluted with  $\text{Et}_2\text{O}$ , washed with saturated  $\text{NH}_4\text{Cl}(\text{aq})$ , saturated  $\text{NaHCO}_3(\text{aq})$ , and brine. The combined aqueous solutions were extracted with  $\text{CH}_2\text{Cl}_2$ . The combined organic solutions were dried over  $\text{Na}_2\text{SO}_4$ , filtered, concentrated in *vacuo*, and purified by flash chromatography (petroleum ether/ethyl acetate 10:1) to afford the desired products.

### **General procedure for the palladium-catalyzed asymmetric allylic amination**

To a stirring solution of  $[\text{Pd}_2(\text{dba})_3]\cdot\text{CHCl}_3$  (8.3mg, 0.008 mmol) in THF(1 mL) was added ligand **4a** (12.4mg, 0.024 mmol) under an argon atmosphere. After 1 h, rac-(*E*)-1,3-diphenyl-2-propenyl acetate **8a** (100 mg, 0.396 mmol) was added and the solution was stirred for 15 min. Nucleophile **17** (1.19mmol) was added to the mixture followed by BSA, (0.29 mL, 1.19 mmol) and sodium acetate (4.8mg, 0.059mmol). After 24 h, the reaction was diluted with  $\text{Et}_2\text{O}$ , washed with saturated  $\text{NH}_4\text{Cl}(\text{aq})$ , saturated  $\text{NaHCO}_3(\text{aq})$ , and brine. The combined aqueous solutions were extracted with  $\text{CH}_2\text{Cl}_2$ . The combined organic solutions were dried over  $\text{Na}_2\text{SO}_4$ , filtered, concentrated in *vacuo*, and purified by flash chromatography (petroleum ether/ethyl acetate 10:1) to a yellow oil.

### **NMR and HRMS spectra for chiral ligands 4a-g**

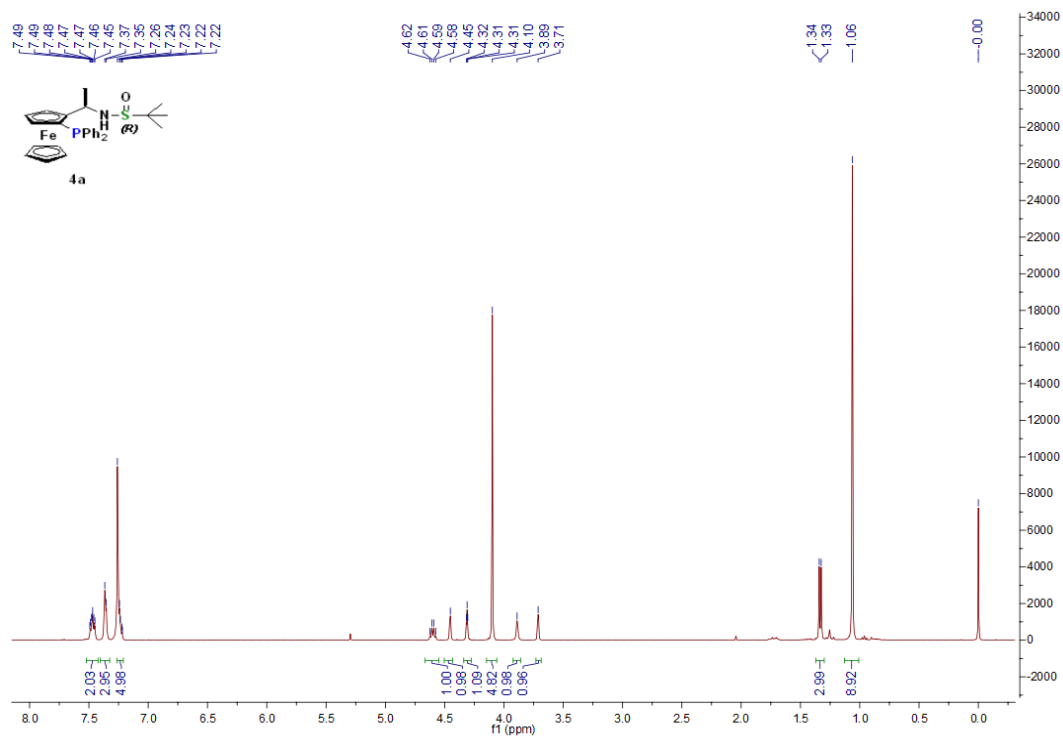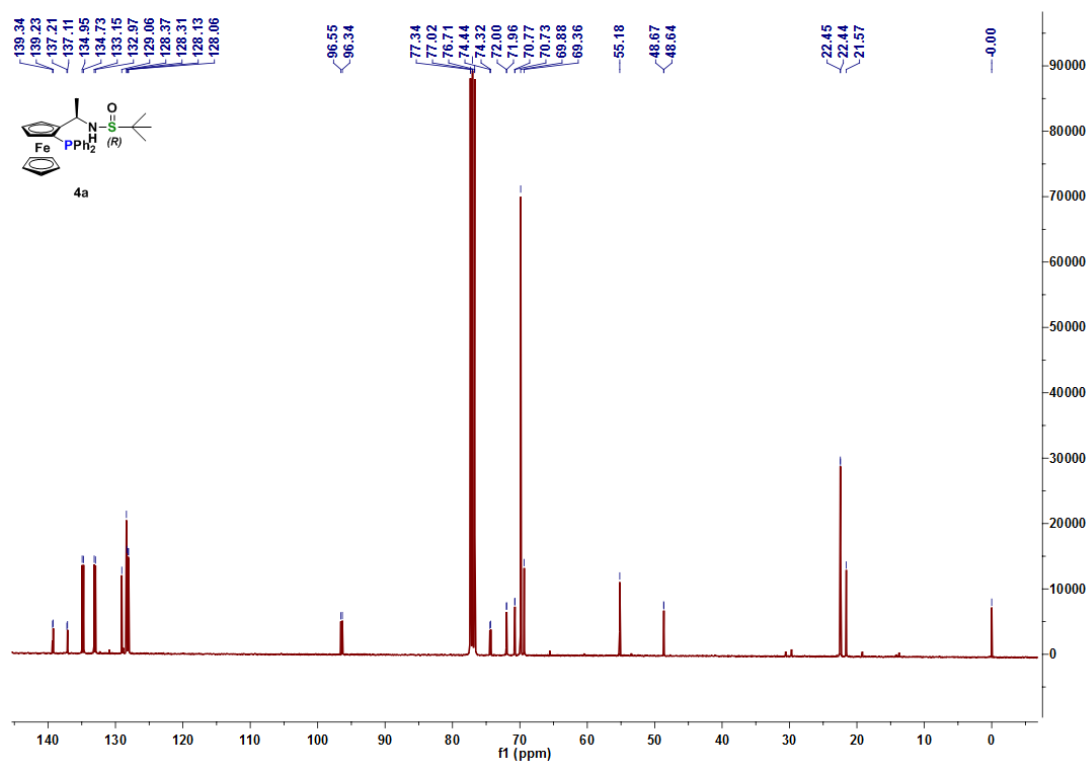

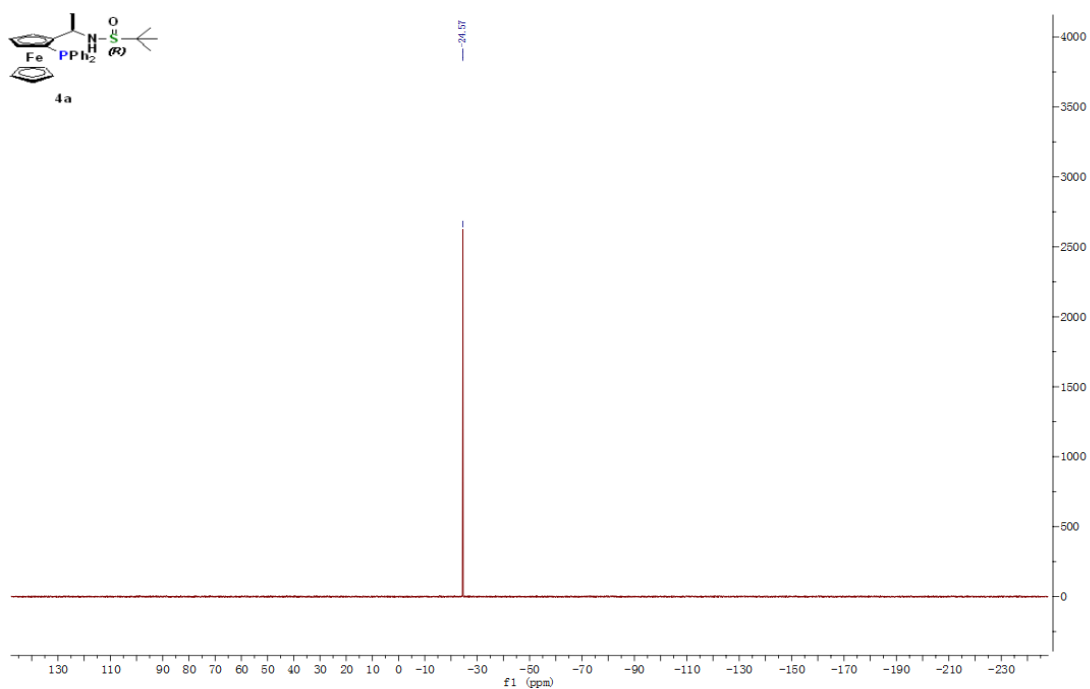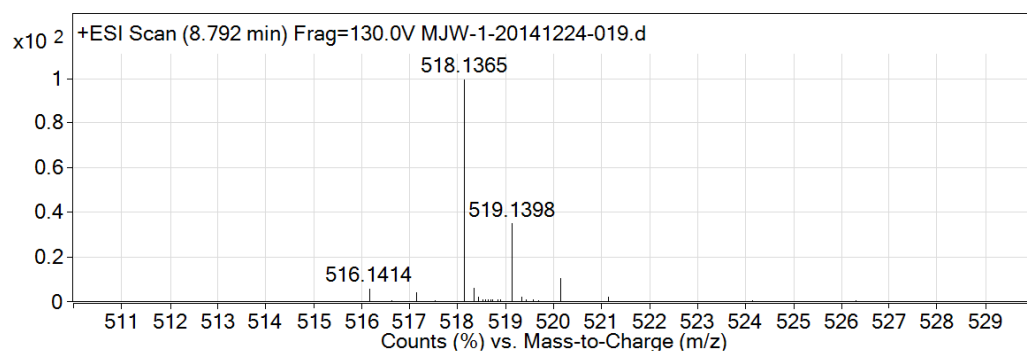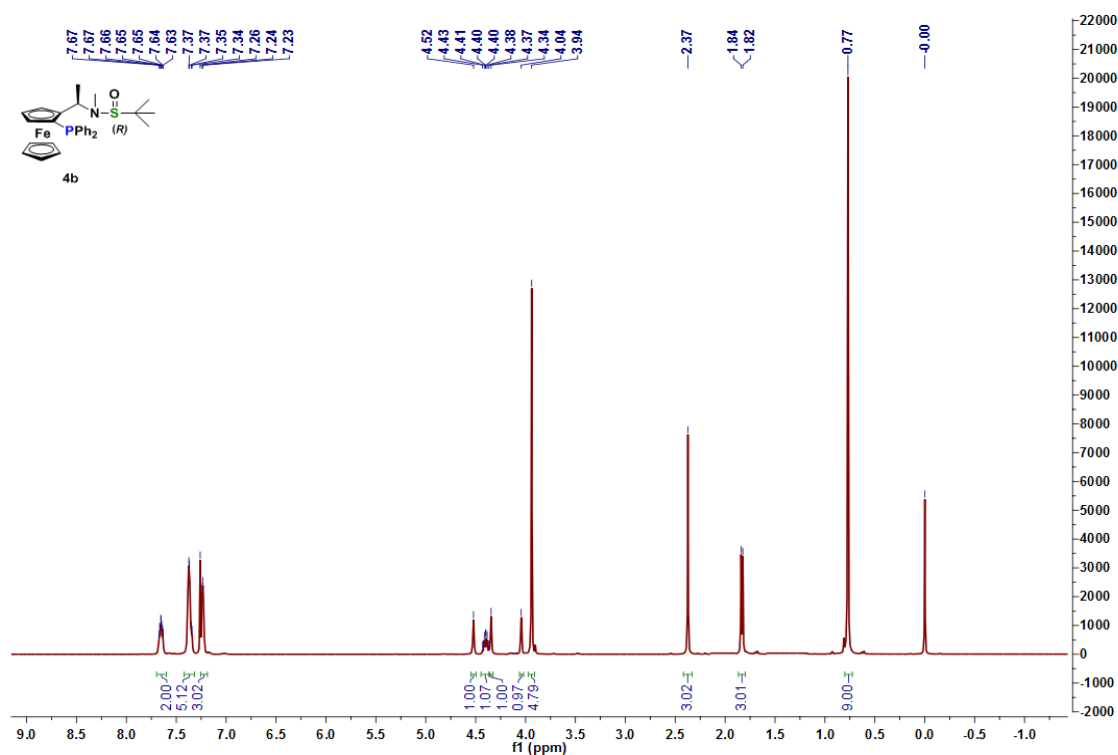



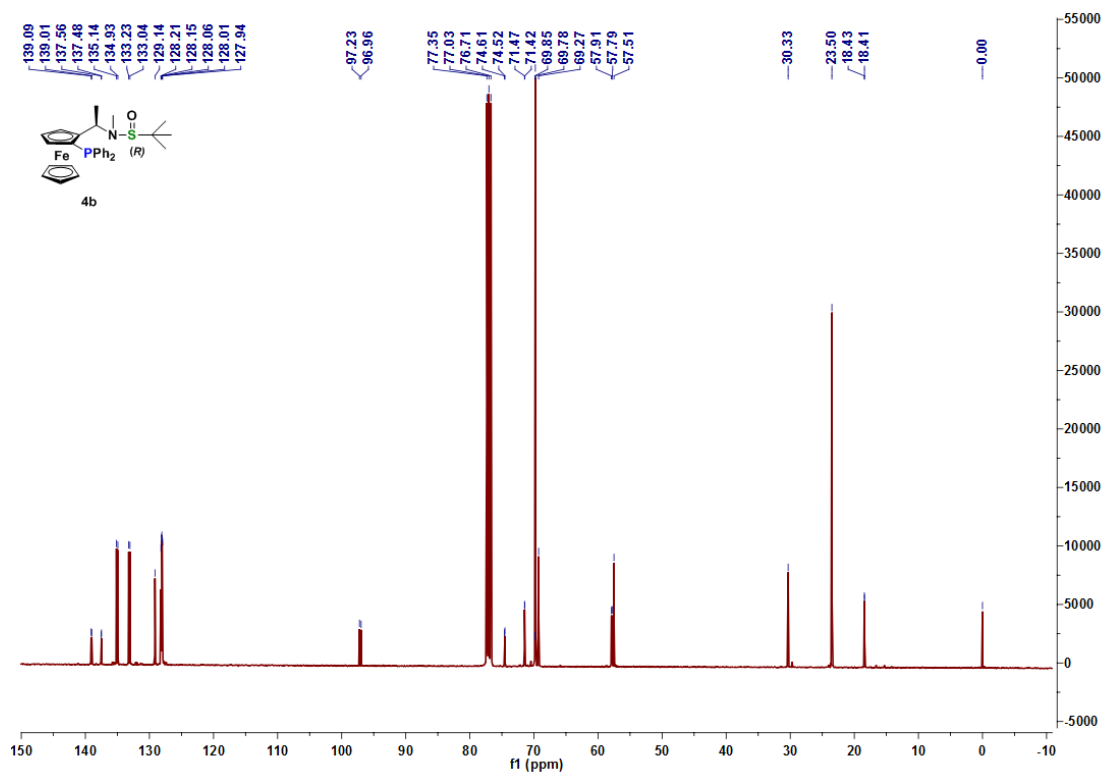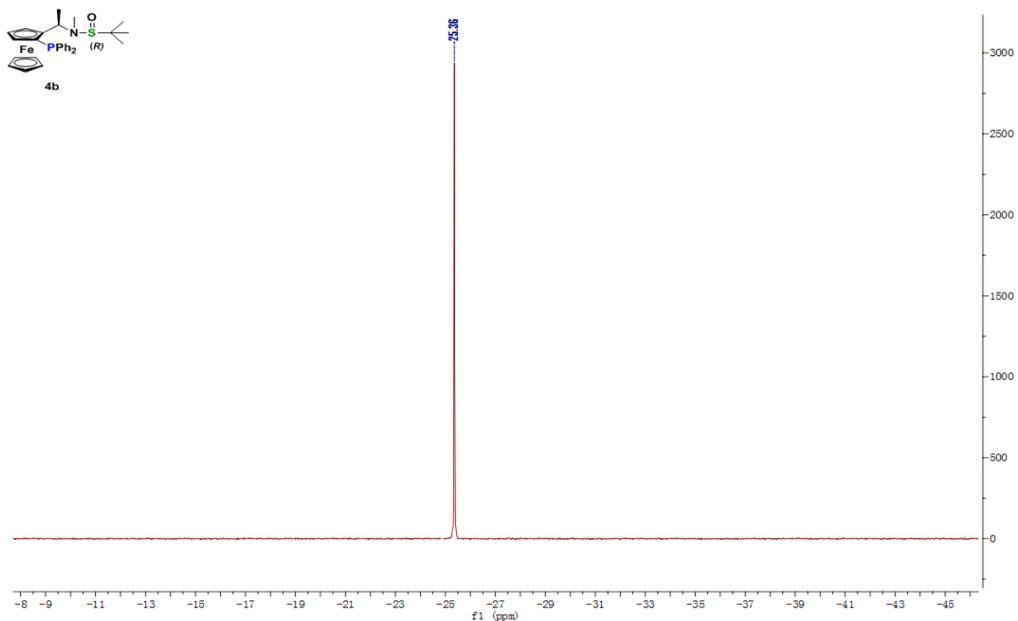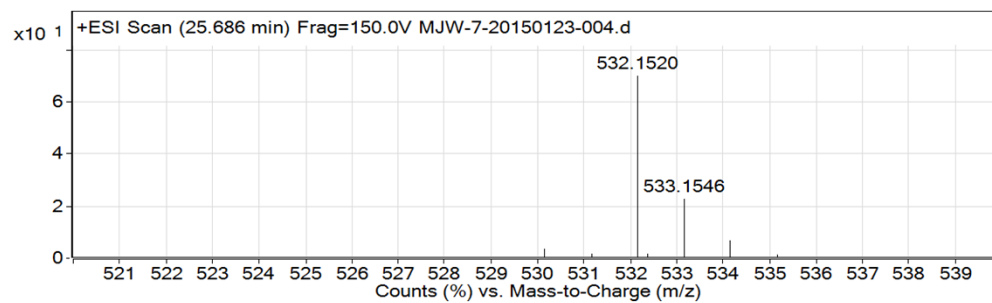

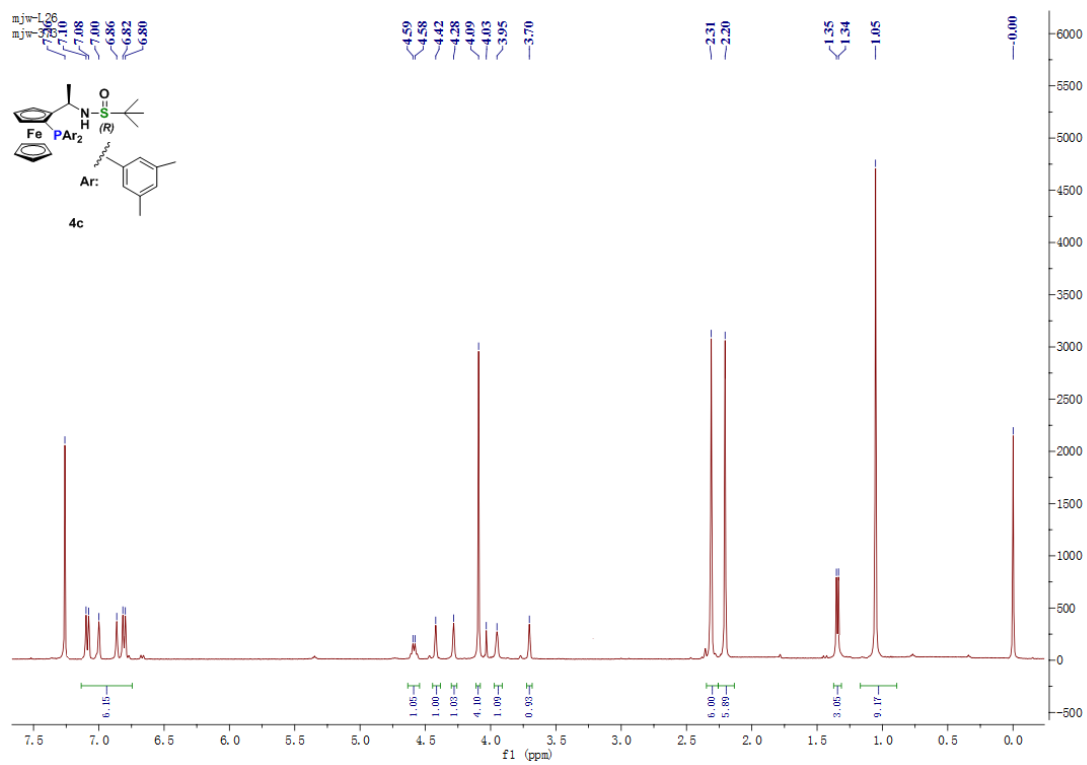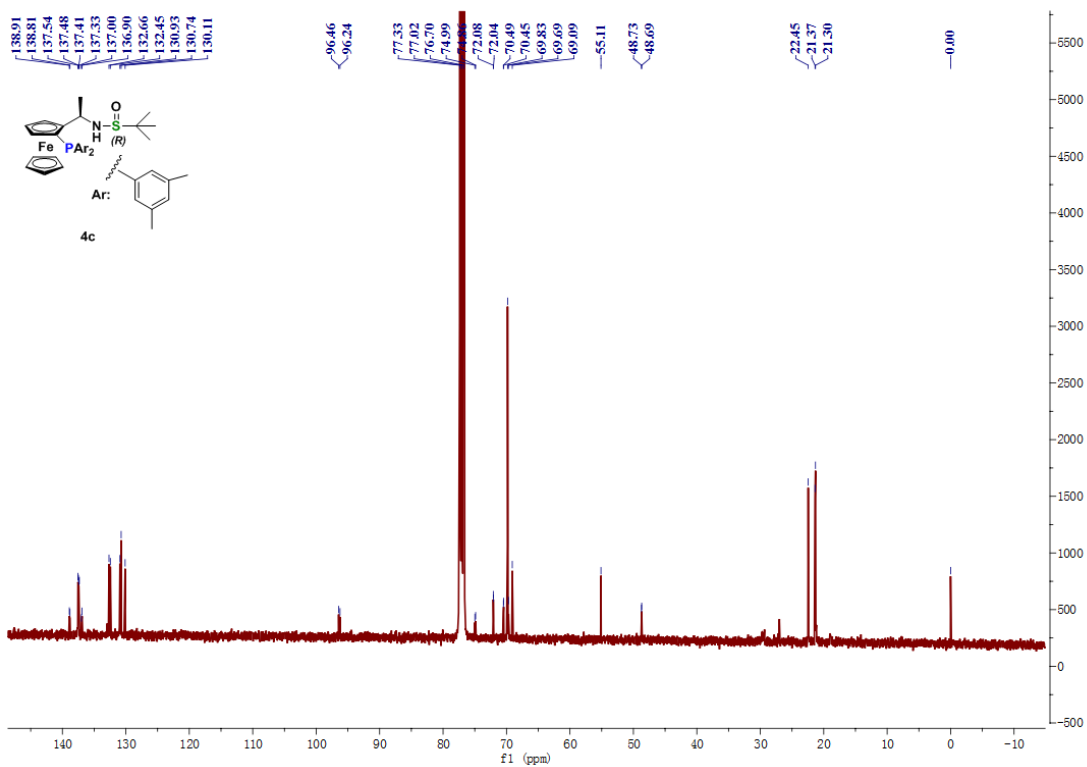

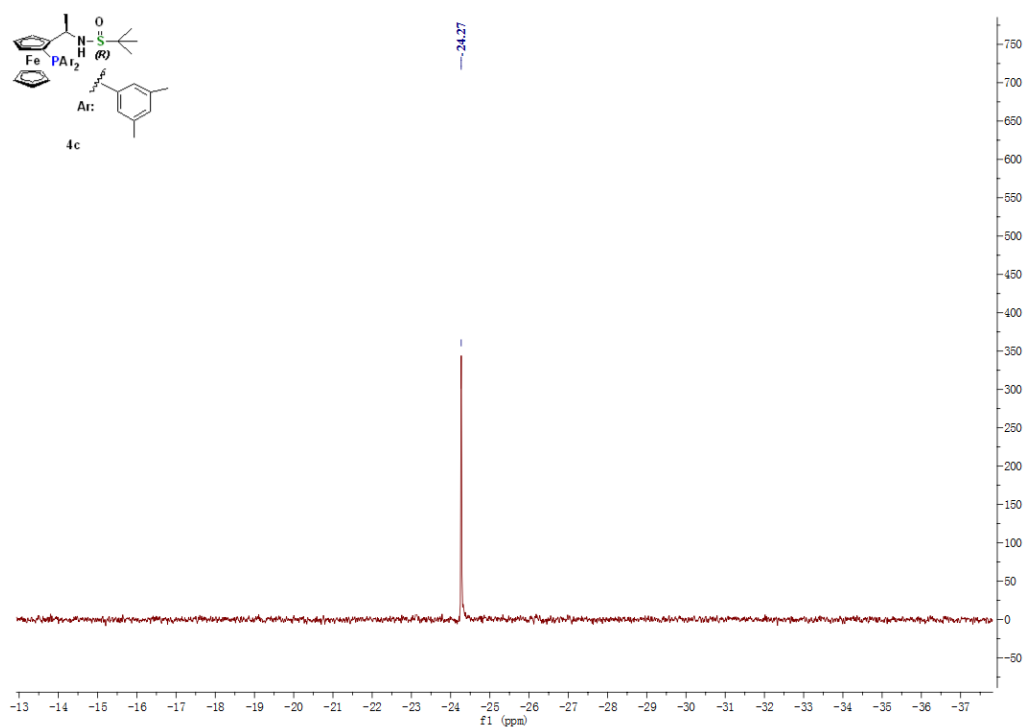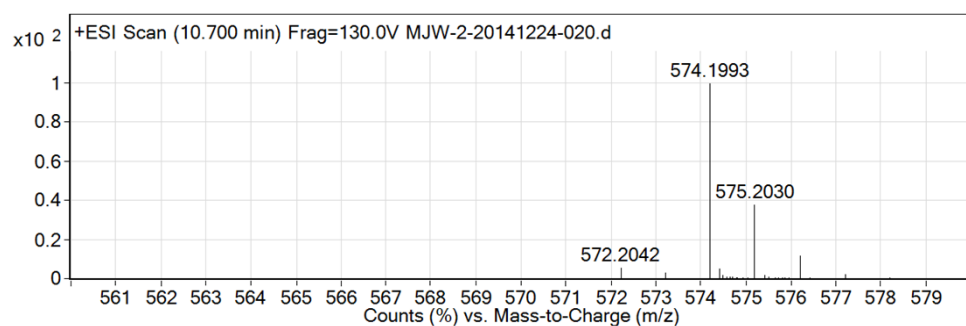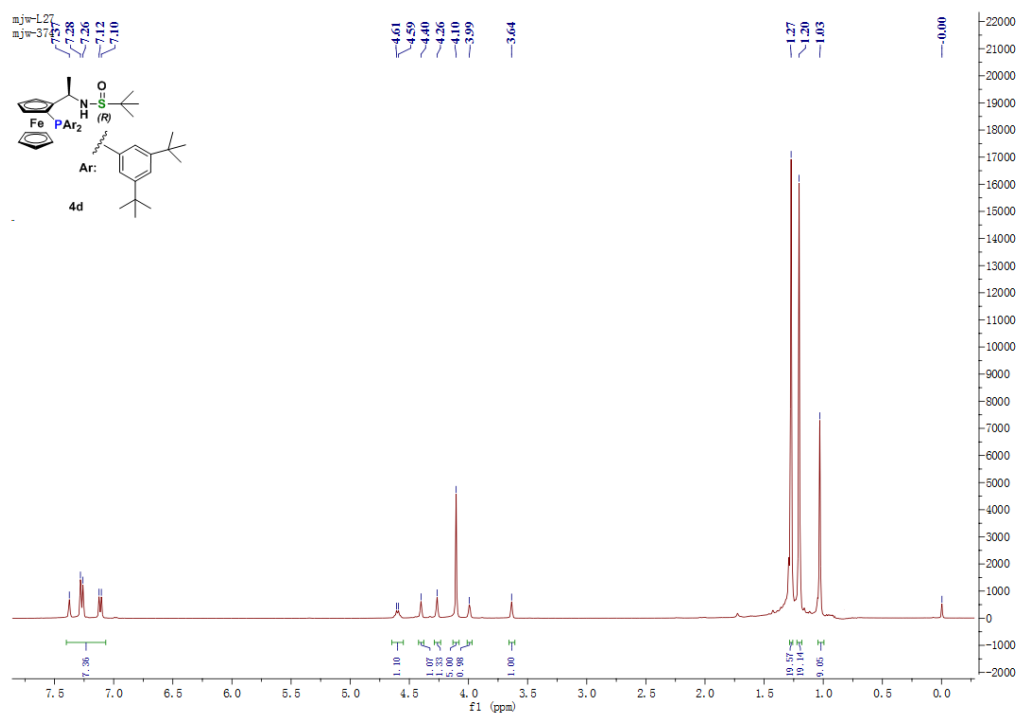

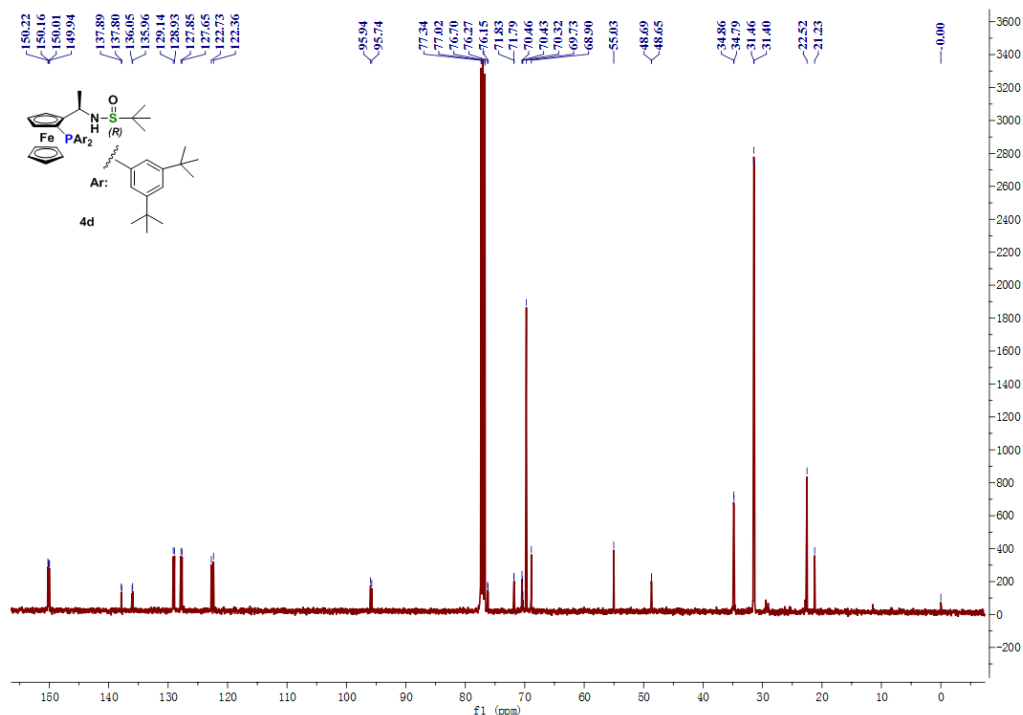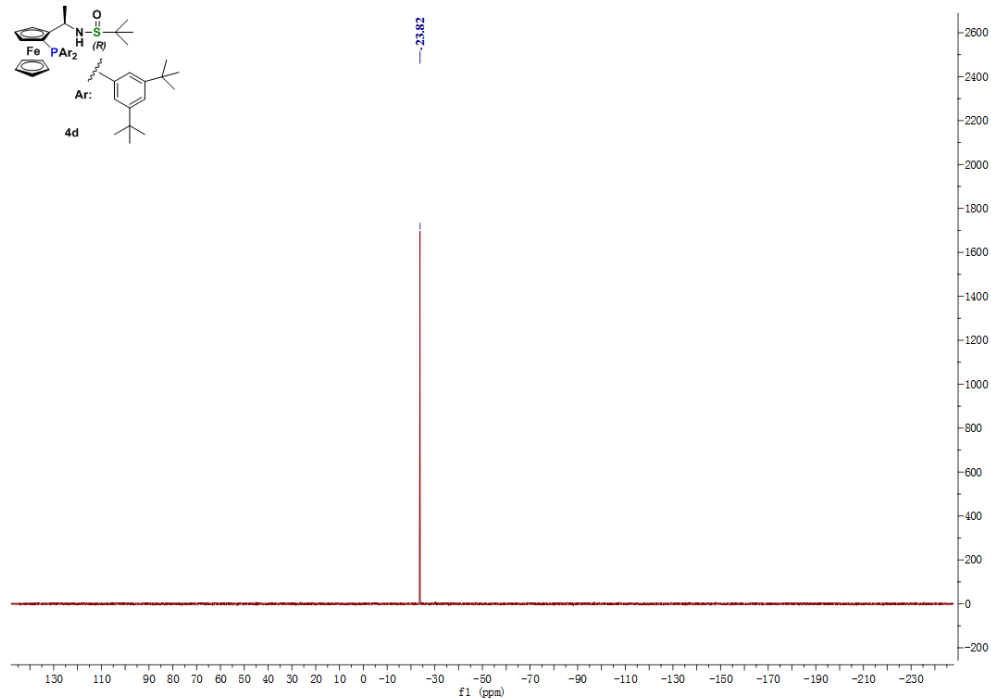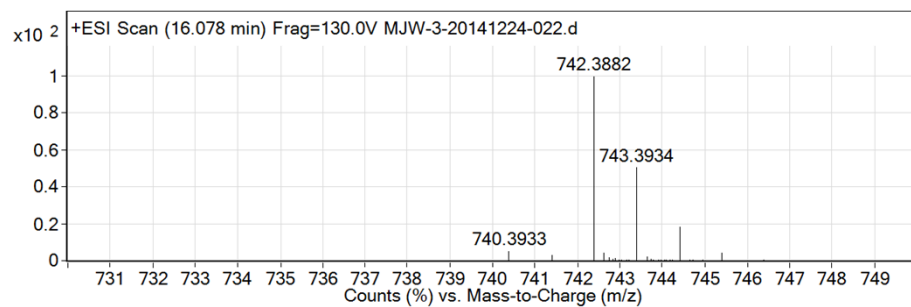

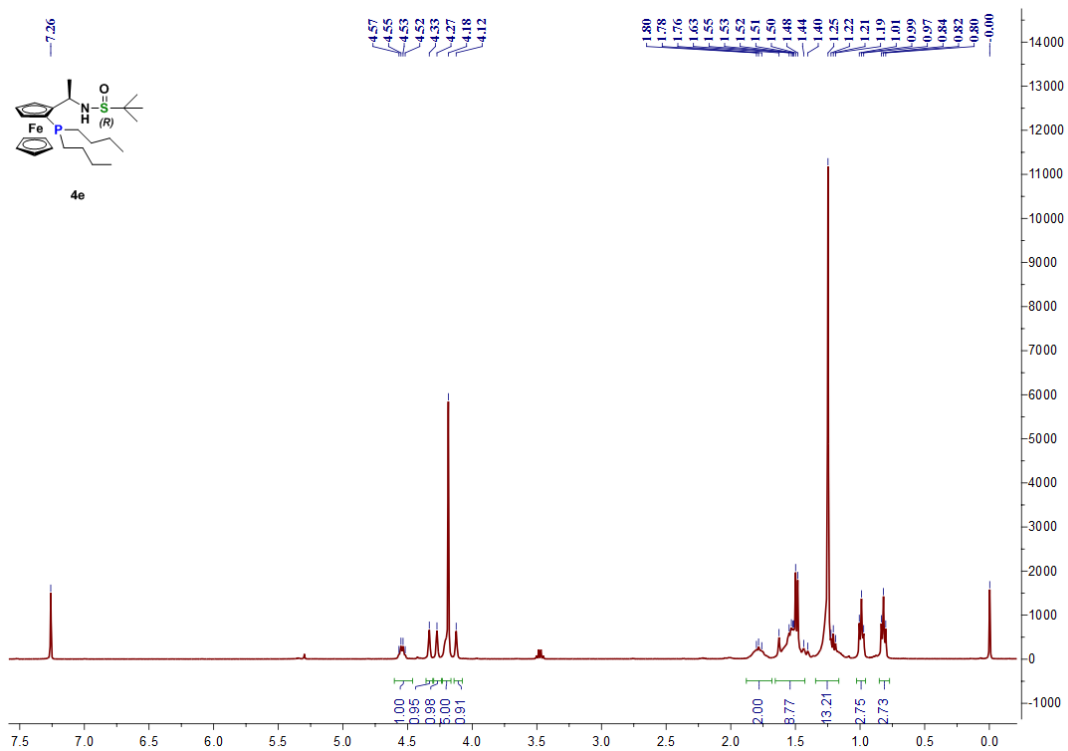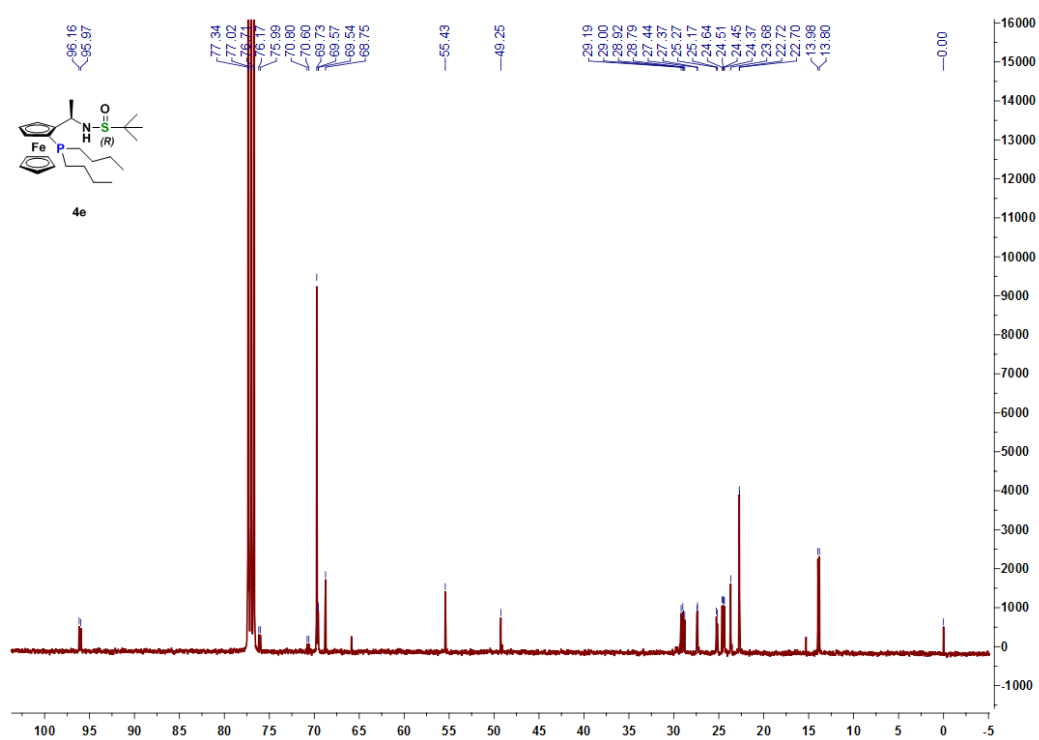

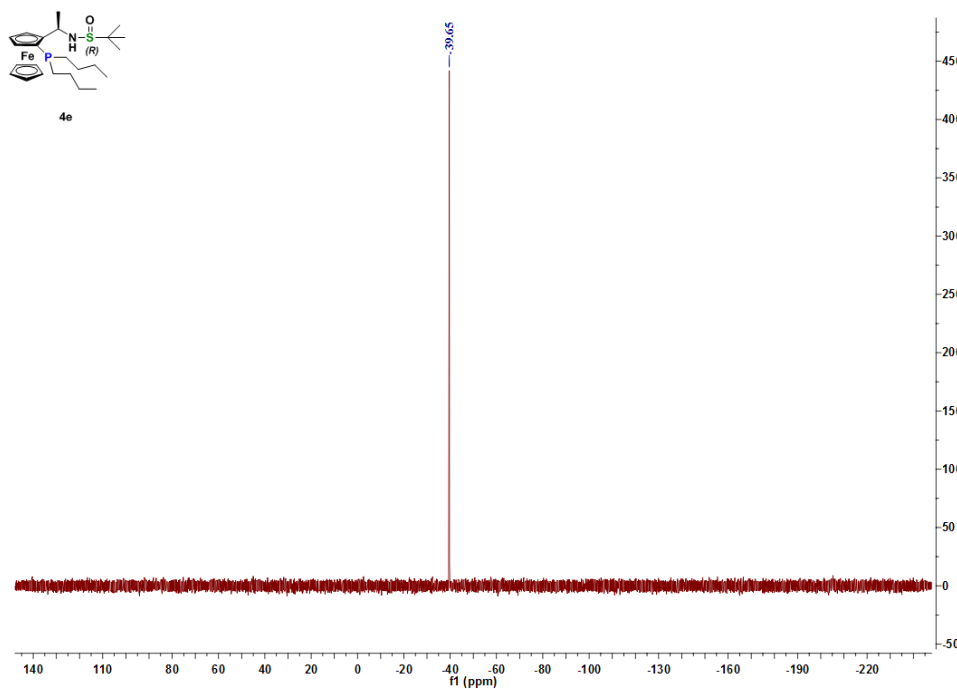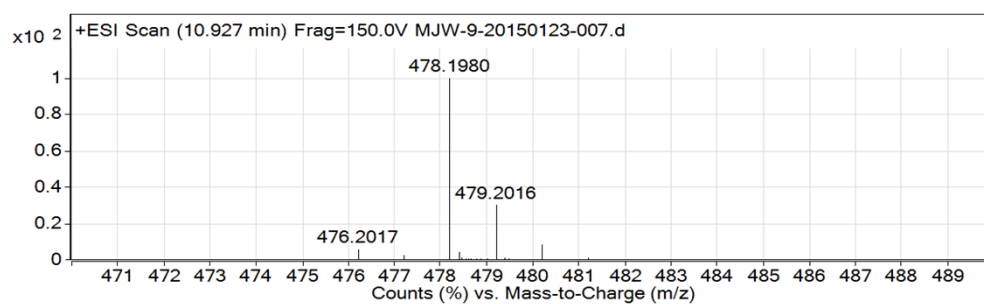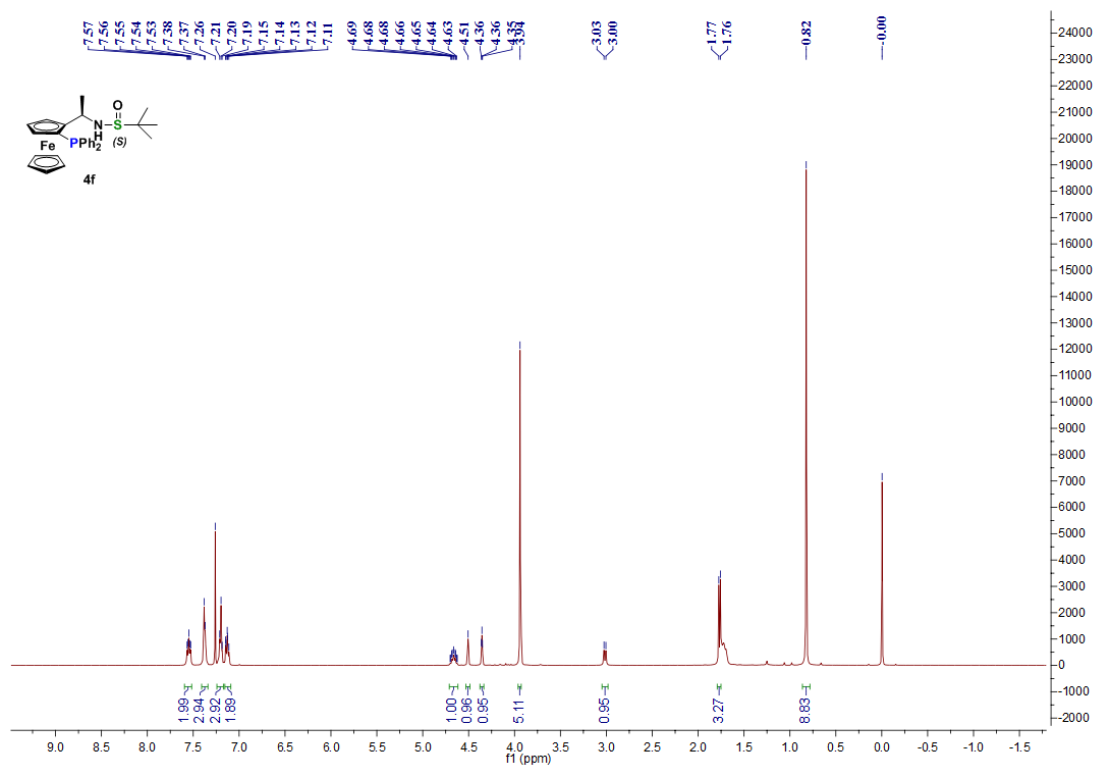

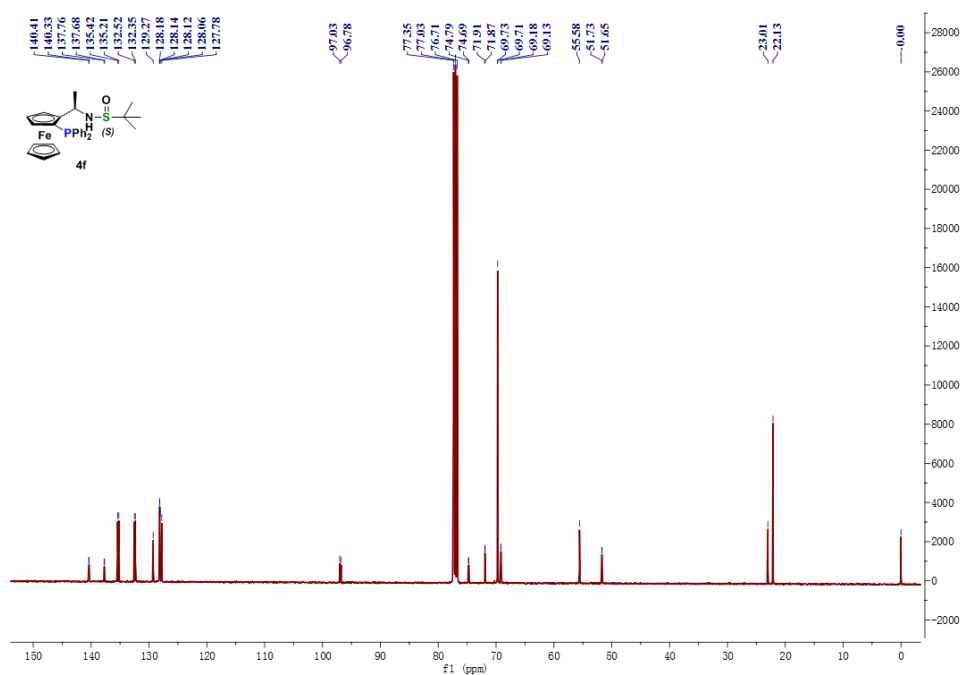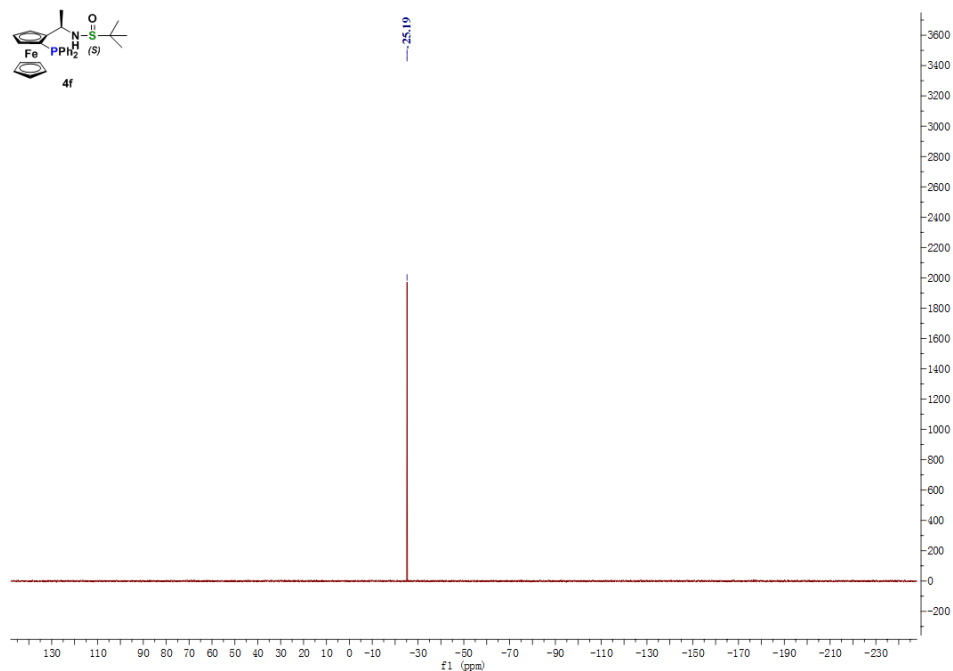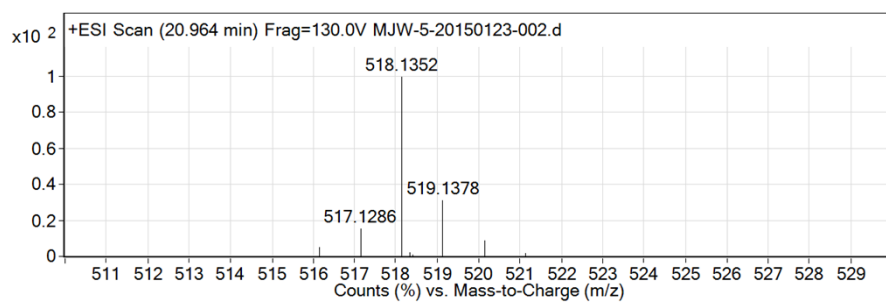

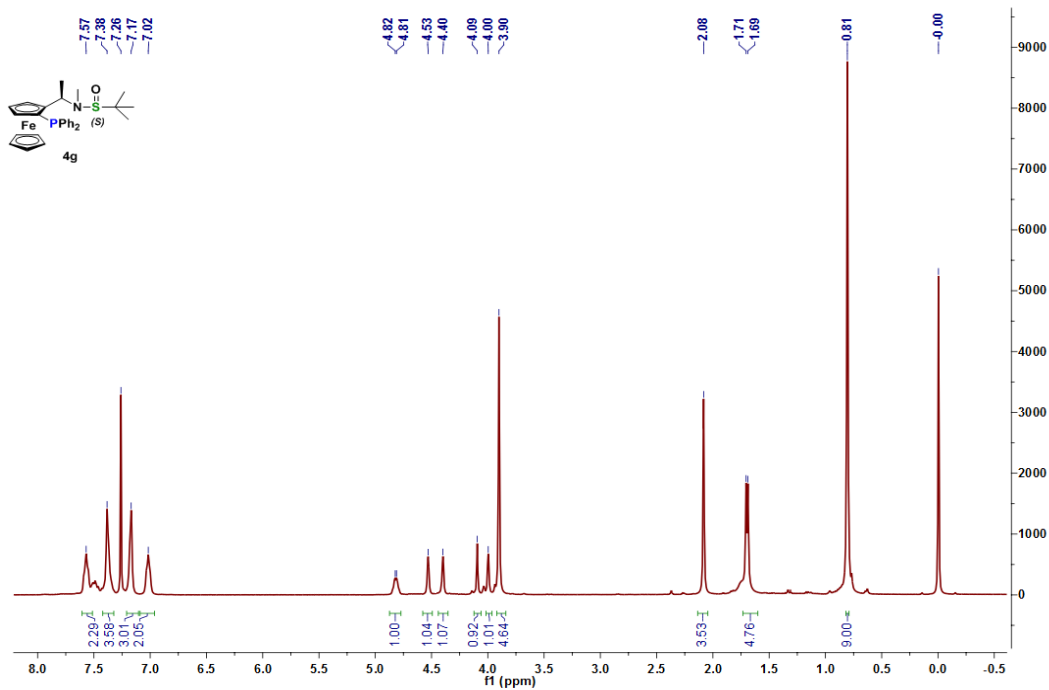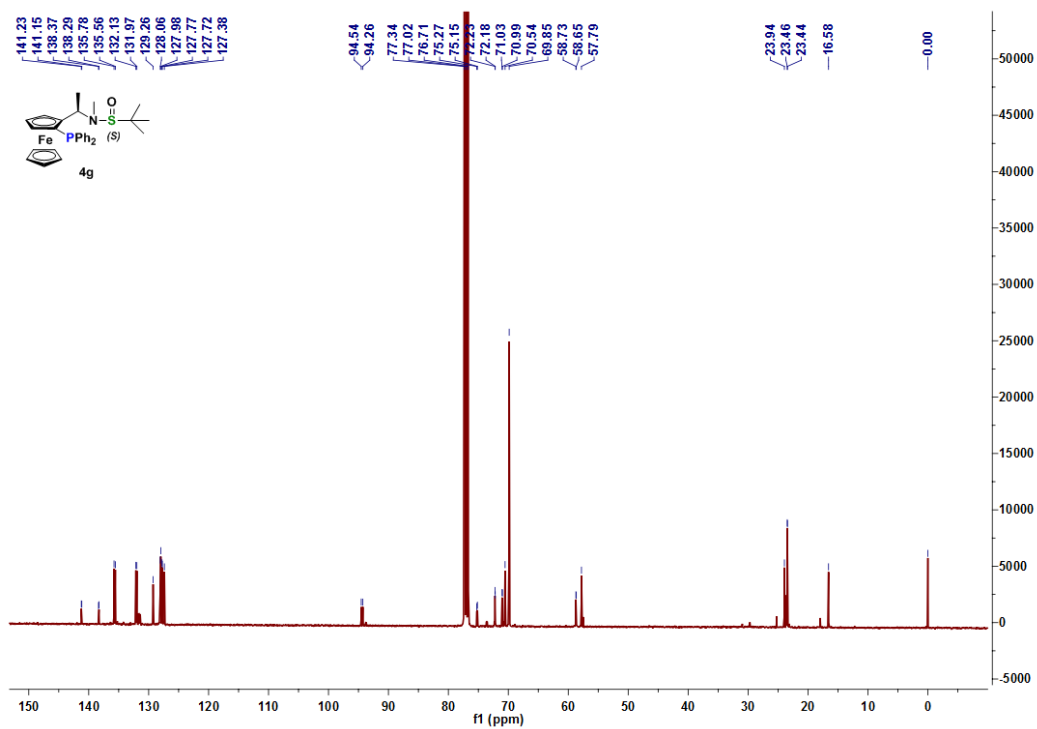



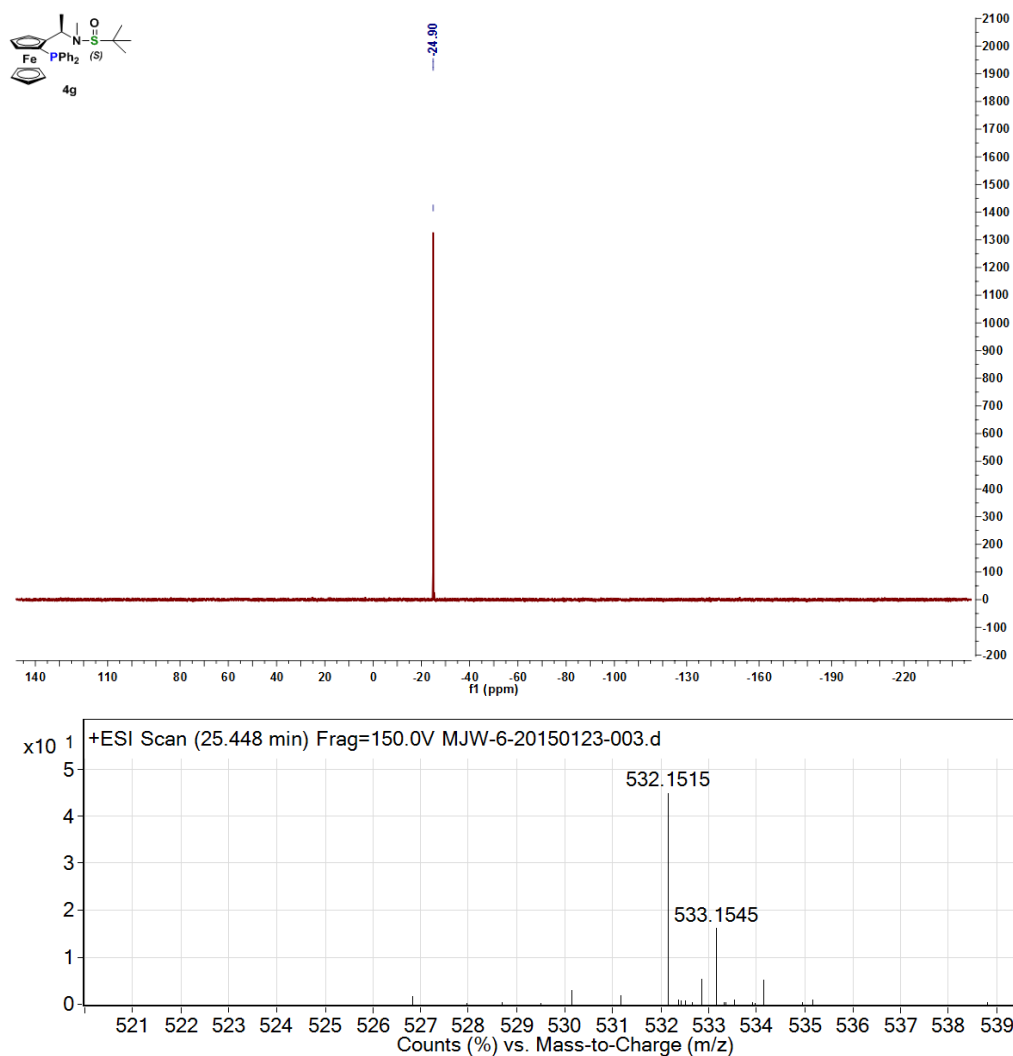

## NMR spectra and HPLC analysis of products

### **(*R,E*)-dimethyl 2-(1,3-diphenylallyl)malonate (10a)**

White solid; yield: 62%; ee: 89%;  $^1\text{H}$  NMR (400 MHz,  $\text{CDCl}_3$ )  $\delta$  7.33-7.20 (m, 10H), 6.51-6.47 (m, 1H), 6.37-6.31 (m, 1H), 4.30-4.25 (m, 1H), 3.98-3.95 (m, 1H), 3.71 (s, 3H), 3.52 (s, 3H); HPLC (Chiralpak AD-H column, 254 nm, 80:20 hexane/isopropanol, flow = 0.8 mL/min)  $t_R$  = 10.1 min, 13.7 min.

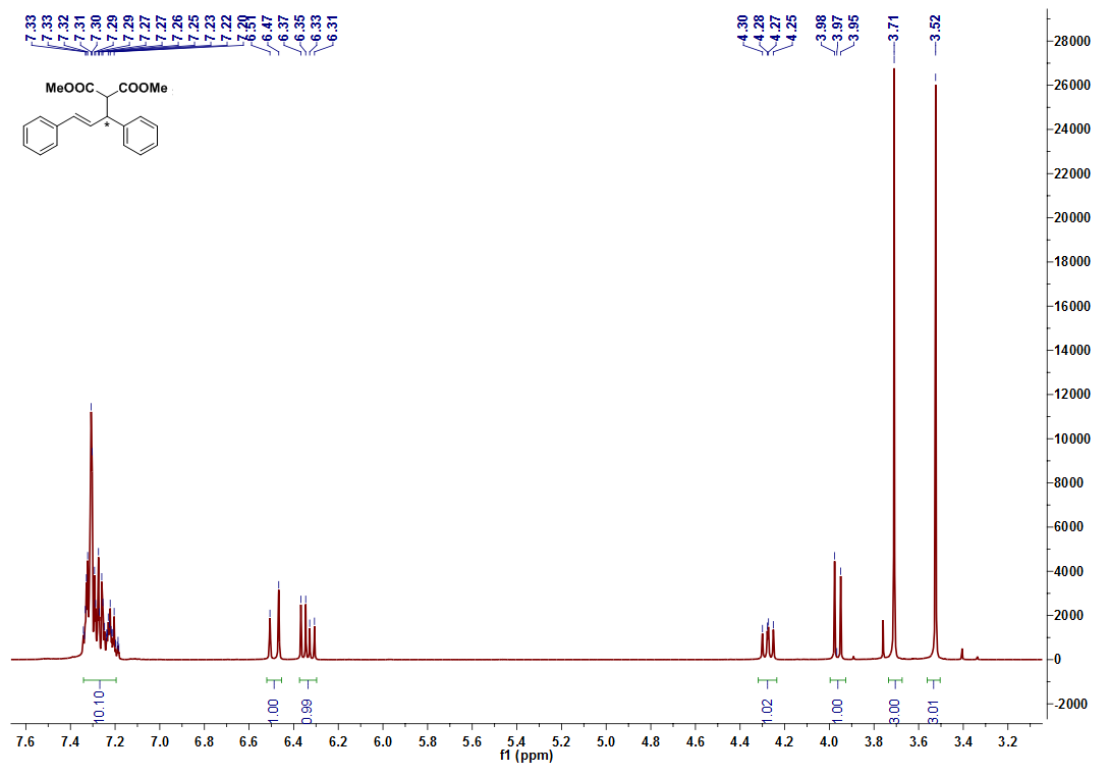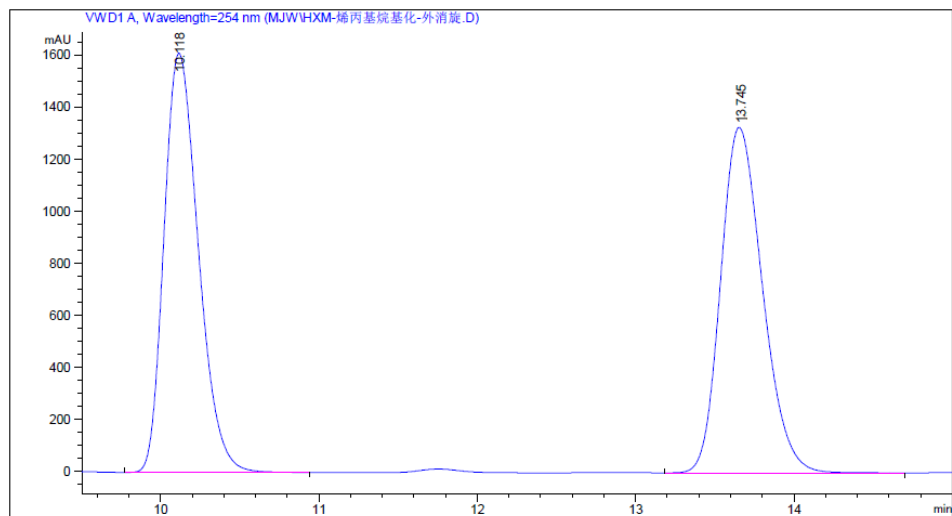

# 面积百分比报告

排序 : 保留时间  
 乘积因子 : 1.0000  
 稀释因子 : 1.0000  
 内标中不使用乘积因子和稀释因子

信号 1: VWD1 A, Wavelength=254 nm

| 峰 # | 保留时间 [min] | 信号 | 类型 | 峰面积 [mAU*s] | 峰高 [mAU]   | 峰面积 %   |
|-----|------------|----|----|-------------|------------|---------|
| 1   | 10.118     | 1  | BV | 2.42826e4   | 1610.23438 | 49.8899 |
| 2   | 13.745     | 1  | VV | 2.43898e4   | 1326.31616 | 50.1101 |

总量 : 4.86725e4 2936.55054

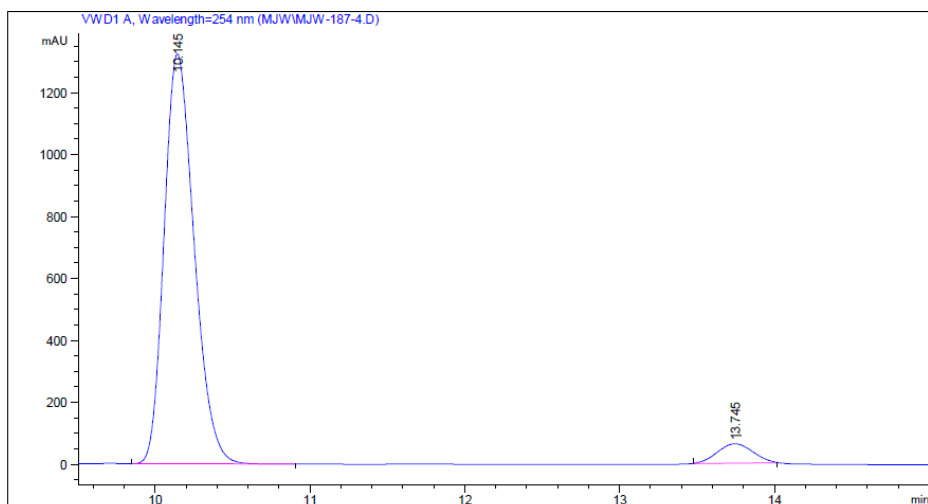

=====  
 面积百分比报告  
 =====

排序 : 保留时间  
 乘积因子 : 1.0000  
 稀释因子 : 1.0000  
 内标中不使用乘积因子和稀释因子

信号 1: VWD1 A, Wavelength=254 nm

| 峰 # | 保留时间 [min] | 信号 | 类型 | 峰面积 [mAU*s] | 峰高 [mAU]   | 峰面积 %   |
|-----|------------|----|----|-------------|------------|---------|
| 1   | 10.145     | 1  | BB | 1.78631e4   | 1323.28235 | 94.6948 |
| 2   | 13.745     | 1  | MM | 1000.76367  | 62.90810   | 5.3052  |

总量 : 1.88638e4 1386.19045

**(*R,E*)-diethyl 2-(1,3-diphenylallyl)malonate (10b)**

Colorless oil; yield: 65%; ee: 88%; <sup>1</sup>H NMR (400 MHz, CDCl<sub>3</sub>) δ 7.32 – 7.21 (m, 10H), 6.46 (d, *J* = 15.8 Hz, 1H), 6.33 (dd, *J* = 15.7, 8.6 Hz, 1H), 4.27 (t, *J* = 9.6 Hz, 1H), 4.20-4.15 (m, 2H), 3.95 (m, 3H), 1.21 (t, *J* = 7.1 Hz, 3H), 1.01 (t, *J* = 7.1 Hz, 3H); HPLC (Chiralpak AD-H column, 250 nm, 93:7 hexane/isopropanol, flow = 1 mL/min) *t<sub>R</sub>* = 20.1 min, 27.1 min.

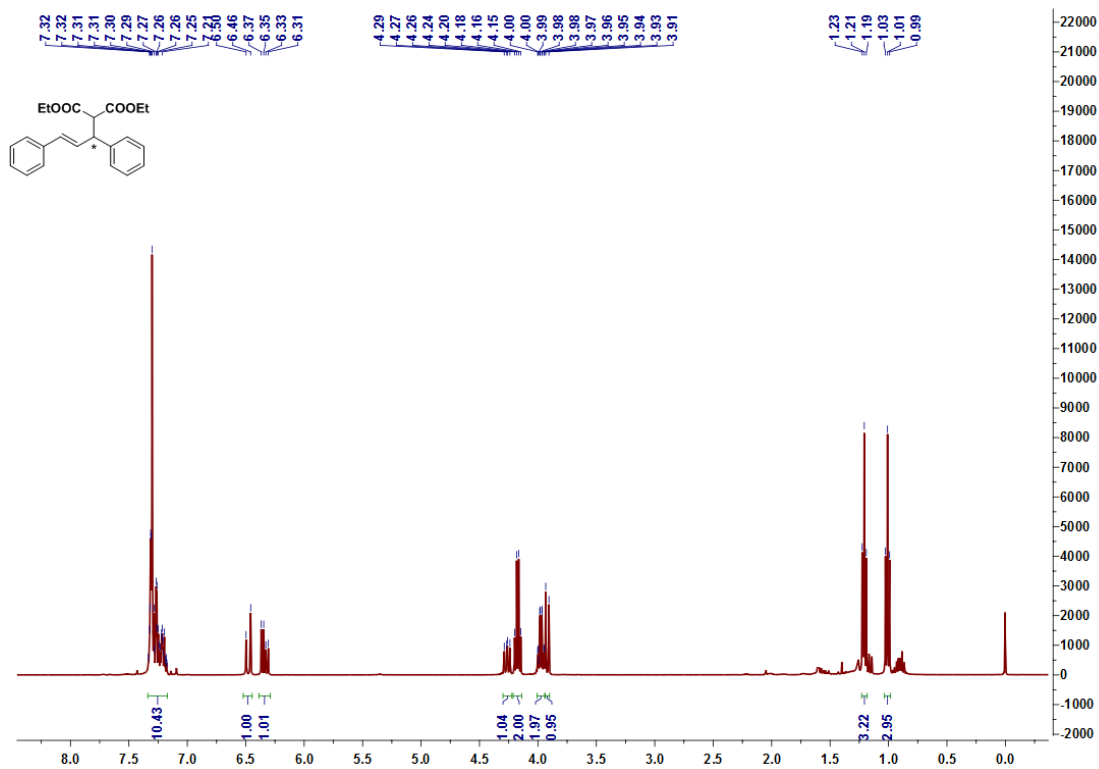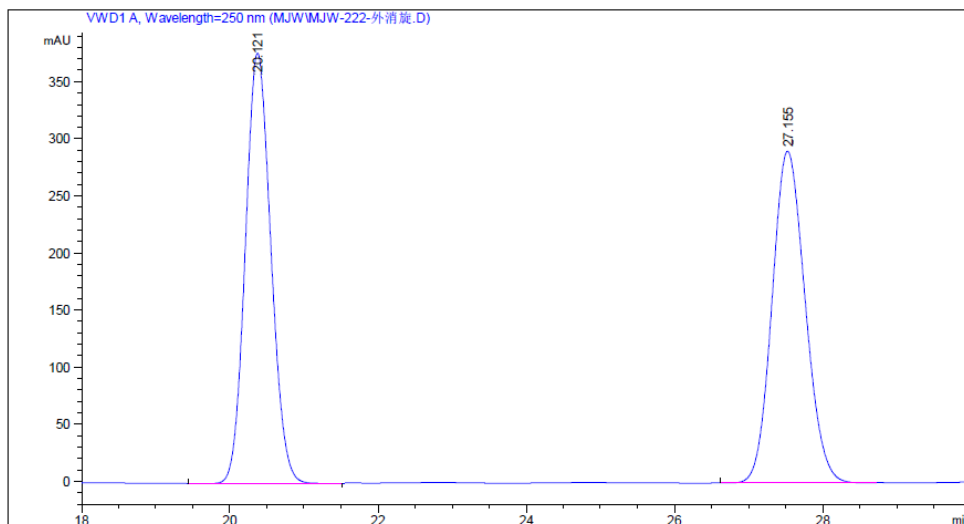

# 面积百分比报告

排序 : 保留时间  
 乘积因子 : 1.0000  
 稀释因子 : 1.0000  
 内标中不使用乘积因子和稀释因子

信号 1: VWD1 A, Wavelength=250 nm

| 峰 # | 保留时间 [min] | 信号 | 类型  | 峰面积 [mAU*s] | 峰高 [mAU]  | 峰面积 %   |
|-----|------------|----|-----|-------------|-----------|---------|
| 1   | 20.121     | 1  | BV  | 1.64238e4   | 631.17773 | 49.9619 |
| 2   | 27.155     | 1  | BBA | 1.64488e4   | 489.20831 | 50.0381 |

总量 : 1.01759e4 399.59596

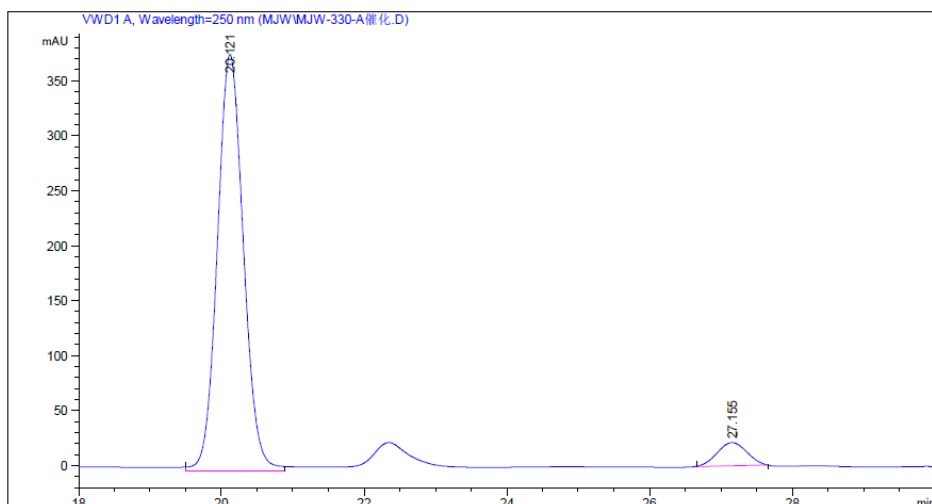

面积百分比报告

排序 : 保留时间  
 乘积因子 : 1.0000  
 稀释因子 : 1.0000  
 内标中不使用乘积因子和稀释因子

信号 1: VWD1 A, Wavelength=250 nm

| 峰 # | 保留时间 [min] | 信号 | 类型 | 峰面积 [mAU*s] | 峰高 [mAU]  | 峰面积 %   |
|-----|------------|----|----|-------------|-----------|---------|
| 1   | 20.121     | 1  | MM | 9570.53320  | 378.46024 | 94.0508 |
| 2   | 27.155     | 1  | MM | 605.39026   | 21.13572  | 5.9492  |

总量 : 1.01759e4 399.59596

**(*R,E*)-dimethyl 2-(1,3-diphenylallyl) -2-methyl-malonate (10c)**

Colorless oil; yield: 55%; ee: 76%; <sup>1</sup>H NMR (400 MHz, CDCl<sub>3</sub>) δ 7.35-7.28 (m, 8H), 7.24-7.20 (m, 2H), 6.68 (dd, *J* = 15.7, 9.0 Hz, 1H), 6.46 (d, *J* = 15.7 Hz, 1H), 4.30 (d, *J* = 9.0 Hz, 1H), 3.74 (s, 3H), 3.62 (s, 3H), 1.43 (d, *J* = 7.3 Hz, 3H); HPLC (Chiralpak AD-H + AD-H column, 254 nm, 99:1 hexane/isopropanol, flow = 0.5 mL/min) t<sub>R</sub> = 60.1min, 62.7 min.

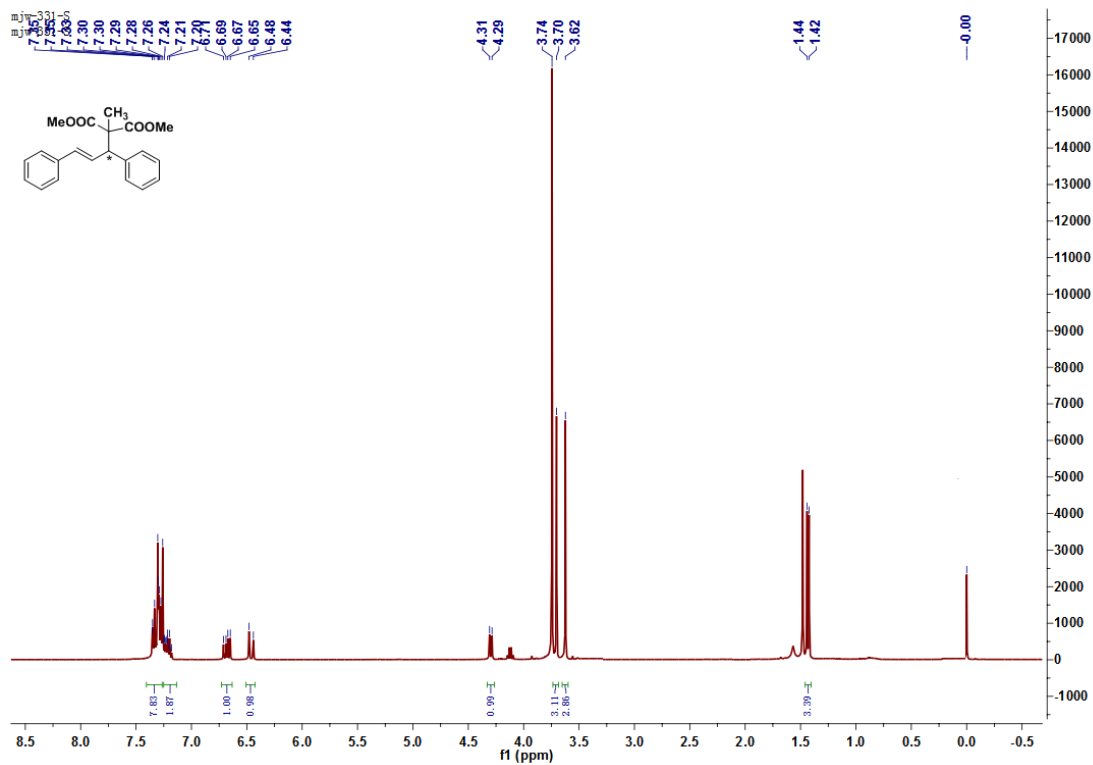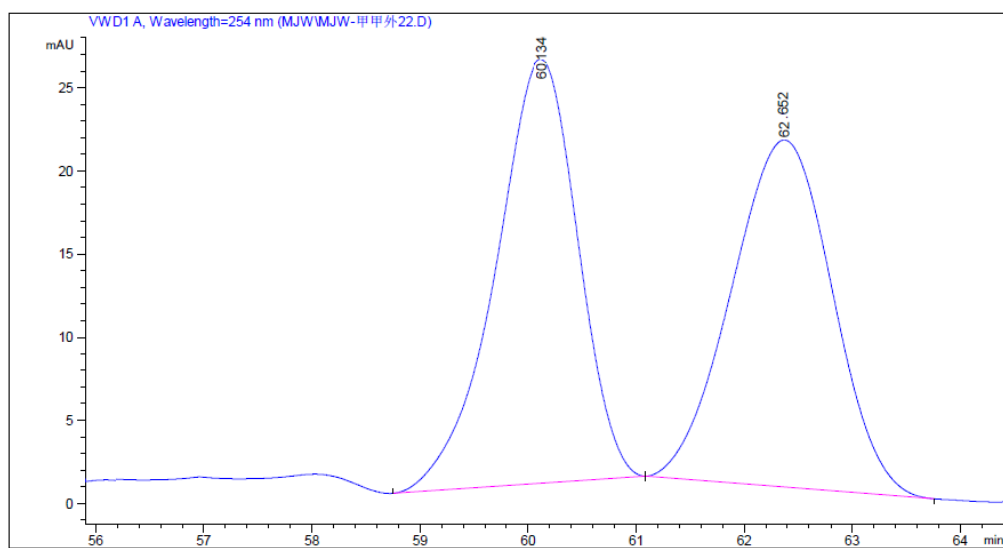

# 面积百分比报告

排序 : 信号  
 乘积因子 : 1.0000  
 稀释因子 : 1.0000  
 内标使用乘积因子和稀释因子

信号 1: VWD1 A, Wavelength=254 nm

| 峰 # | 保留时间 [min] | 类型 | 峰宽 [min] | 峰面积 [mAU*s] | 峰高 [mAU] | 峰面积 %   |
|-----|------------|----|----------|-------------|----------|---------|
| 1   | 60.134     | BB | 0.9400   | 1575.77173  | 25.49616 | 49.8155 |
| 2   | 62.652     | BB | 1.1835   | 1587.44519  | 20.86811 | 50.1845 |

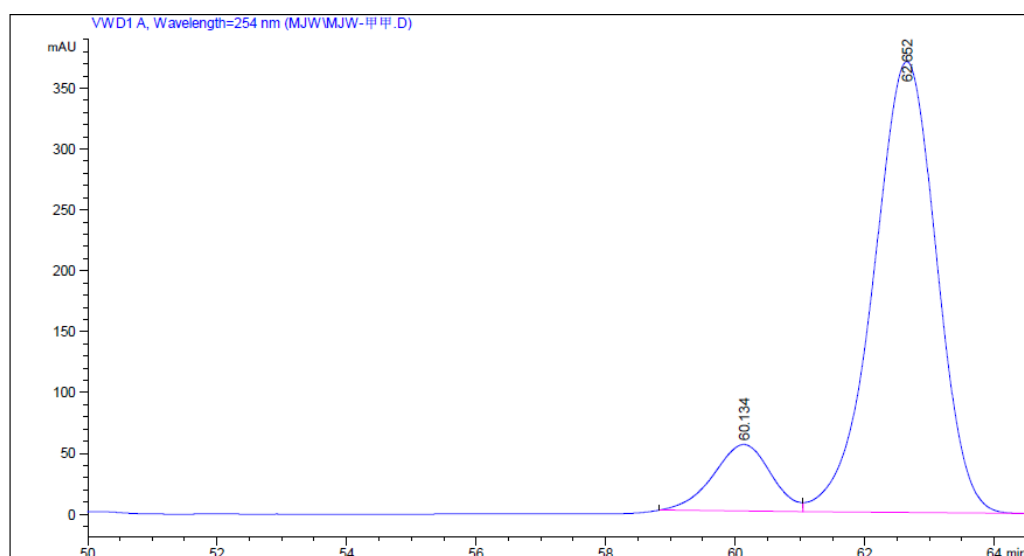

=====  
面积百分比报告  
=====

排序 : 信号  
乘积因子 : 1.0000  
稀释因子 : 1.0000  
内标使用乘积因子和稀释因子

信号 1: VWD1 A, Wavelength=254 nm

| 峰 # | 保留时间 [min] | 类型  | 峰宽 [min] | 峰面积 [mAU*s] | 峰高 [mAU]  | 峰面积 %   |
|-----|------------|-----|----------|-------------|-----------|---------|
| 1   | 60.134     | BV  | 0.9169   | 3368.10791  | 54.50529  | 11.8504 |
| 2   | 62.652     | VBA | 1.0503   | 2.50538e4   | 370.34085 | 88.1496 |

**(*R,E*)-3-(1,3-diphenylallyl)pentane-2,4-dione (10d)**

Colorless oil; yield: 41%; ee: 29%;  $^1\text{H}$  NMR (400 MHz,  $\text{CDCl}_3$ )  $\delta$  7.32-7.23 (m, 10H), 6.44 (d,  $J = 16$  Hz, 1H), 6.19 (ddd,  $J = 15.8, 5.1, 2.9$  Hz, 1H), 4.35-4.33 (m, 2H), 2.25 (s, 3H), 1.93 (s, 3H); HPLC (Chiralpak AD-H column, 254 nm, 99:1 hexane/isopropanol, flow = 0.5 mL/min)  $t_R = 17.8\text{min}, 19.9\text{ min}$ .

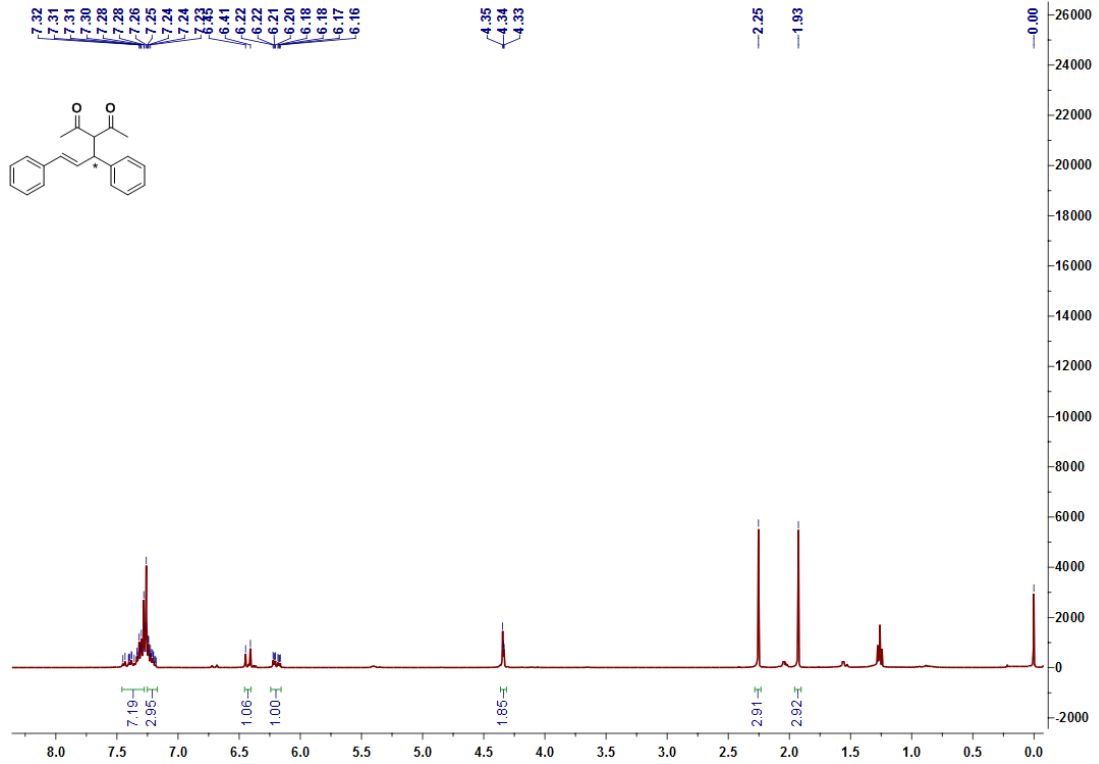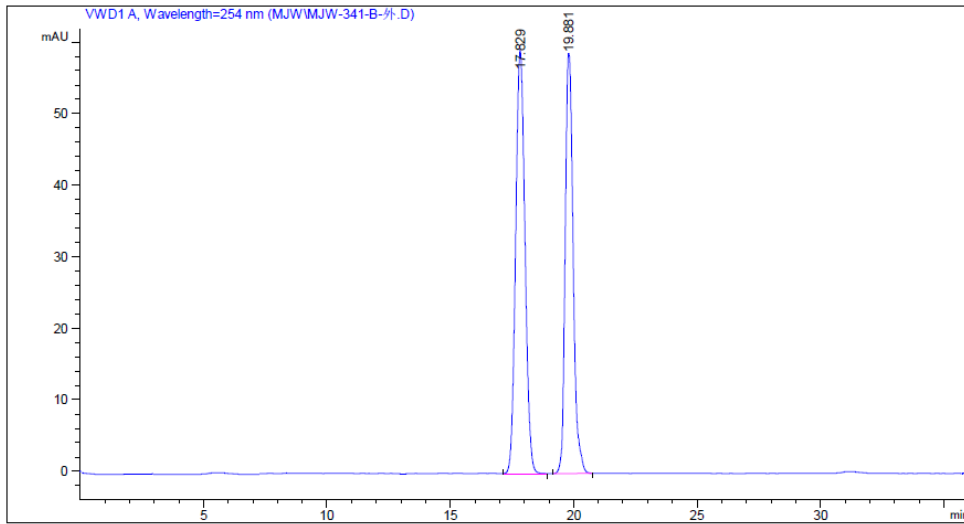

# 面积百分比报告

排序 : 信号  
乘积因子 : 1.0000  
稀释因子 : 1.0000  
内标使用乘积因子和稀释因子

信号 1: VWD1 A, Wavelength=254 nm

| 峰 # | 保留时间 [min] | 类型 | 峰宽 [min] | 峰面积 [mAU*s] | 峰高 [mAU] | 峰面积 %   |
|-----|------------|----|----------|-------------|----------|---------|
| 1   | 17.829     | BB | 0.4118   | 4997.05322  | 59.53874 | 50.0110 |
| 2   | 19.881     | BB | 0.4105   | 4994.86475  | 58.97426 | 49.9890 |



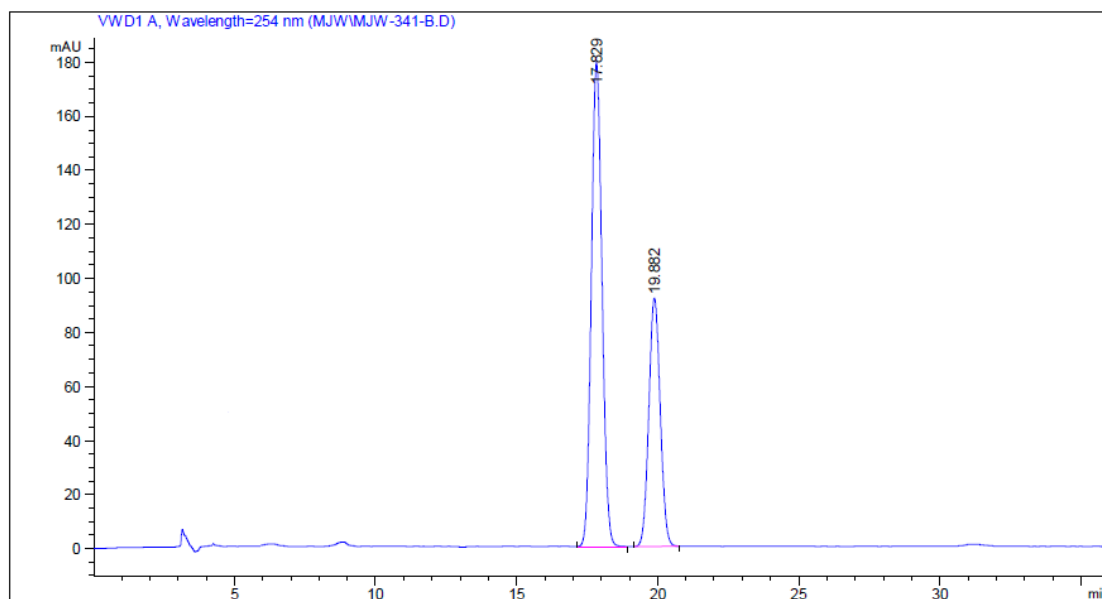

=====  
面积百分比报告  
=====

排序 : 信号  
乘积因子 : 1.0000  
稀释因子 : 1.0000  
内标使用乘积因子和稀释因子

信号 1: VWD1 A, Wavelength=254 nm

| 峰 # | 保留时间 [min] | 类型 | 峰宽 [min] | 峰面积 [mAU*s] | 峰高 [mAU]  | 峰面积 %   |
|-----|------------|----|----------|-------------|-----------|---------|
| 1   | 17.829     | BB | 0.4118   | 4711.36035  | 179.13857 | 64.5788 |
| 2   | 19.882     | BB | 0.4390   | 2584.16284  | 91.91933  | 35.4212 |

**(*R,E*)-dimethyl 2-(1,3-dip-tolylallyl)malonate (10e)**

Colorless oil; yield: 55%; ee: 62%;  $^1\text{H}$  NMR (400 MHz,  $\text{CDCl}_3$ )  $\delta$  7.22-7.07 (m, 8H), 6.42 (d,  $J = 15.7$  Hz, 1H), 6.25 (dd,  $J = 15.7, 8.7$  Hz, 1H), 4.22 (dd,  $J = 10.7, 8.8$  Hz, 1H), 3.92 (d,  $J = 10.9$  Hz, 1H), 3.70 (s, 3H), 3.53 (s, 3H), 2.31 (s, 6H); HPLC (Chiralpak AD-H column, 254 nm, 94:6 hexane/isopropanol, flow = 0.5 mL/min)  $t_R = 37.8\text{min}, 48.4\text{min}$ .

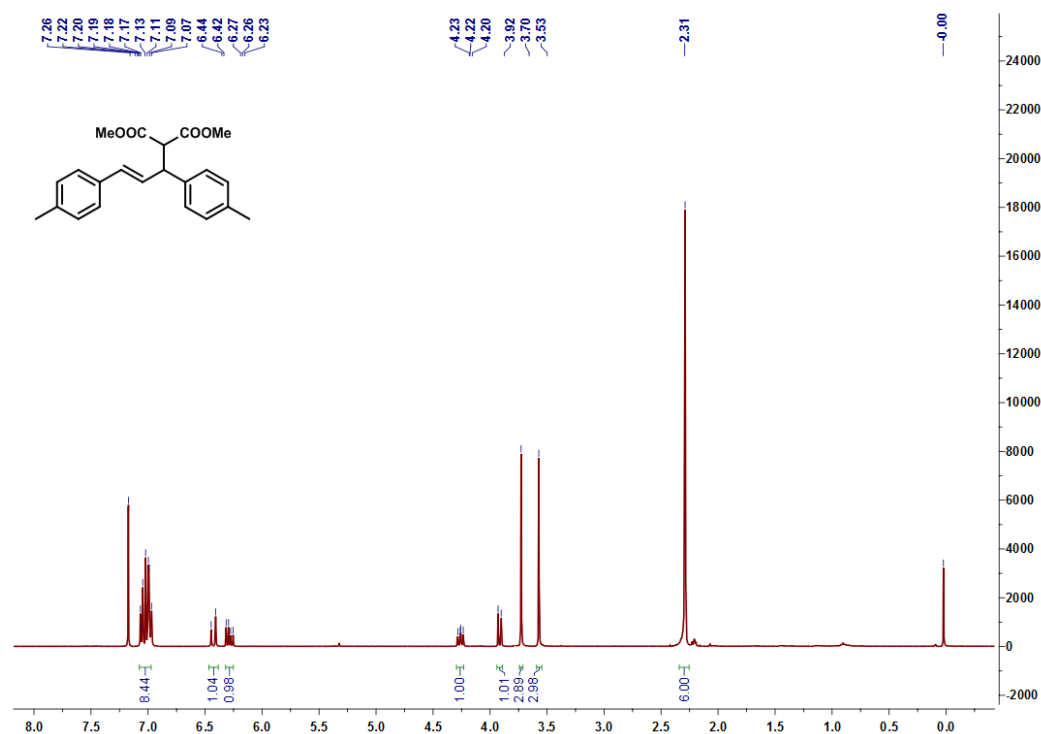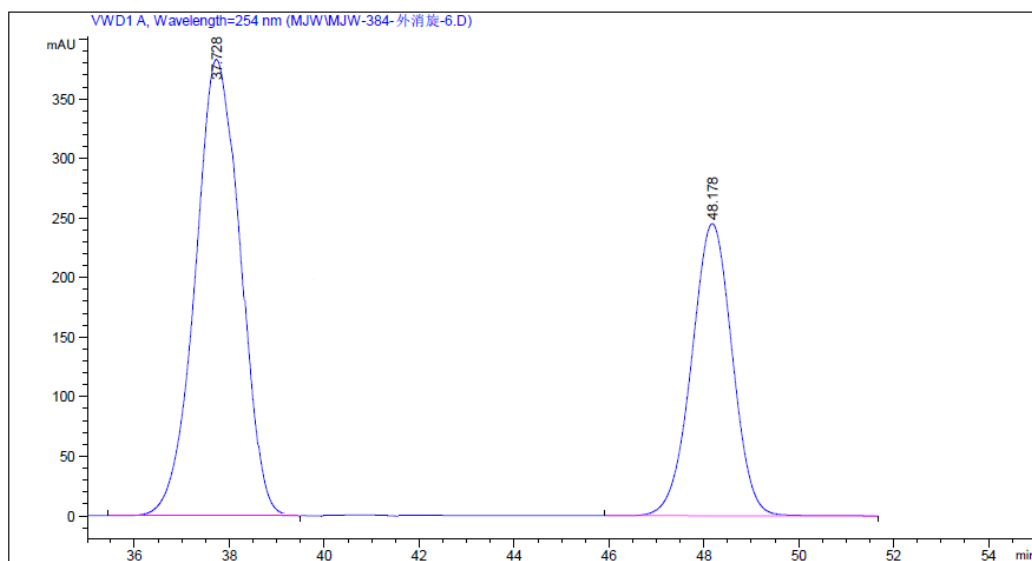

# 面积百分比报告

排序 : 信号  
 乘积因子 : 1.0000  
 稀释因子 : 1.0000  
 内标使用乘积因子和稀释因子

信号 1: VWD1 A, Wavelength=254 nm

| 峰 # | 保留时间 [min] | 类型  | 峰宽 [min] | 峰面积 [mAU*s] | 峰高 [mAU]  | 峰面积 %   |
|-----|------------|-----|----------|-------------|-----------|---------|
| 1   | 37.728     | BV  | 0.8409   | 1.48487e4   | 382.93793 | 50.4286 |
| 2   | 48.178     | BBA | 0.9184   | 1.45963e4   | 245.23520 | 49.5714 |

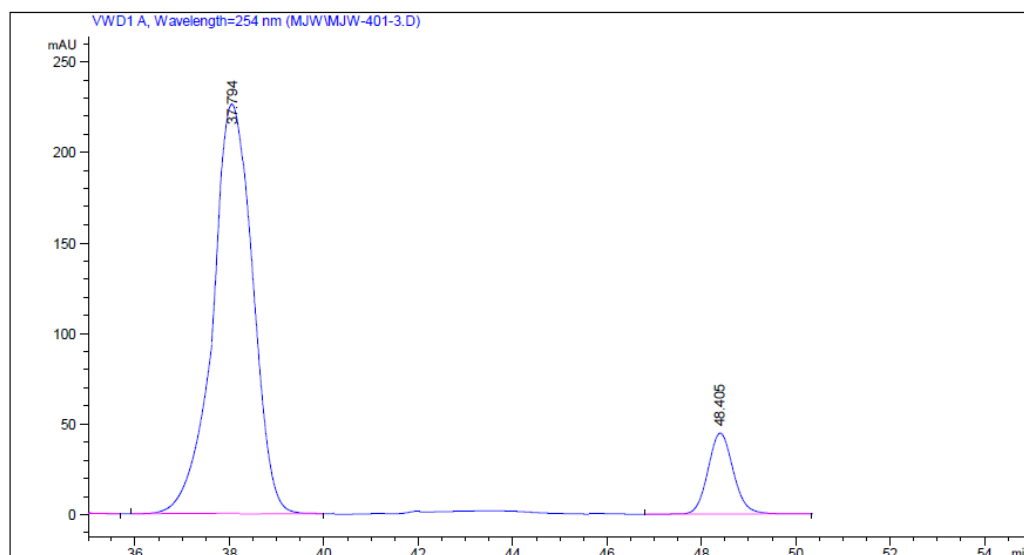

面积百分比报告

排序 : 信号  
 乘积因子 : 1.0000  
 稀释因子 : 1.0000  
 内标使用乘积因子和稀释因子

信号 1: VWD1 A, Wavelength=254 nm

| 峰 # | 保留时间 [min] | 类型  | 峰宽 [min] | 峰面积 [mAU*s] | 峰高 [mAU]  | 峰面积 %   |
|-----|------------|-----|----------|-------------|-----------|---------|
| 1   | 37.794     | BV  | 0.8509   | 5981.40030  | 237.23520 | 81.0049 |
| 2   | 48.405     | BBA | 0.7746   | 1402.59953  | 73.18202  | 18.9951 |

**(*R,E*)-dimethyl 2-(1,3-bis(4-chlorophenyl)allyl)malonate (10f)**

Colorless oil; yield =59%; ee = 78%; <sup>1</sup>H NMR (400 MHz, CDCl<sub>3</sub>) δ 7.33-7.23 (m,8H), 6.43 (d, *J* = 15.8 Hz, 1H), 6.28 (dd, *J* = 15.7, 8.5 Hz, 1H), 4.26 (dd, *J* = 10.7, 8.6 Hz, 1H), 3.92 (d, *J* = 10.8 Hz, 1H), 3.73 (s, 3H), 3.57 (s, 3H). (Chiralpak AD-H column, 254 nm, 85:15 hexane/isopropanol, flow =0.8 mL/min) t<sub>R</sub> = 23.1min, 37.0 min.

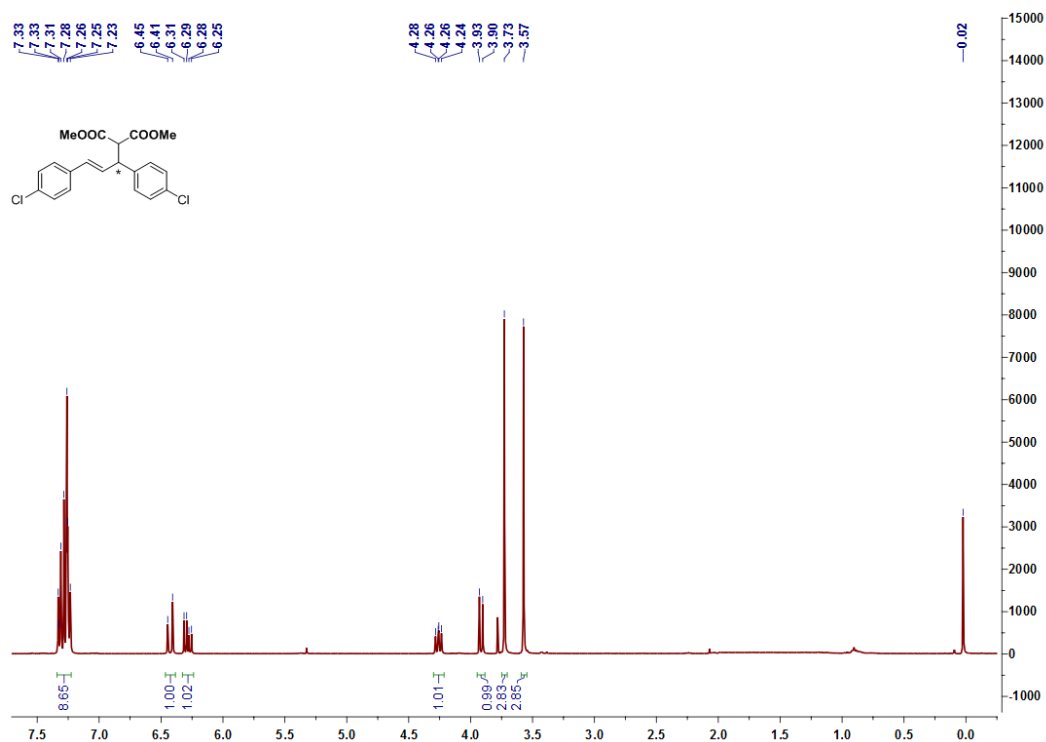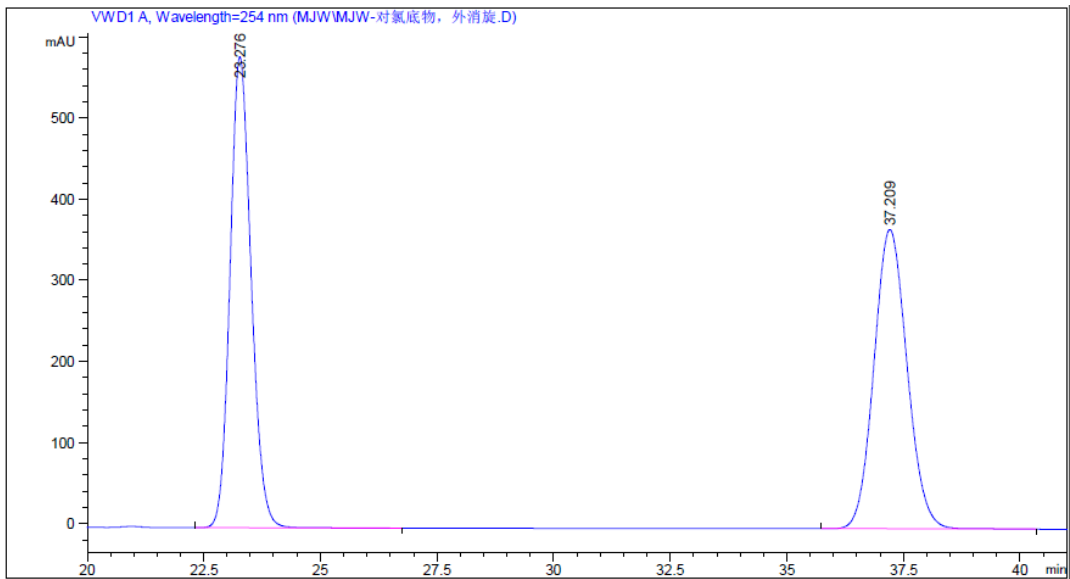

# 面积百分比报告

排序 : 信号  
 乘积因子 : 1.0000  
 稀释因子 : 1.0000  
 内标使用乘积因子和稀释因子

信号 1: VWD1 A, Wavelength=254 nm

| 峰 # | 保留时间 [min] | 类型 | 峰宽 [min] | 峰面积 [mAU*s] | 峰高 [mAU]  | 峰面积 %   |
|-----|------------|----|----------|-------------|-----------|---------|
| 1   | 23.276     | BB | 0.4852   | 1.82190e4   | 580.44214 | 50.0461 |
| 2   | 37.209     | BB | 0.7662   | 1.81854e4   | 368.83459 | 49.9539 |

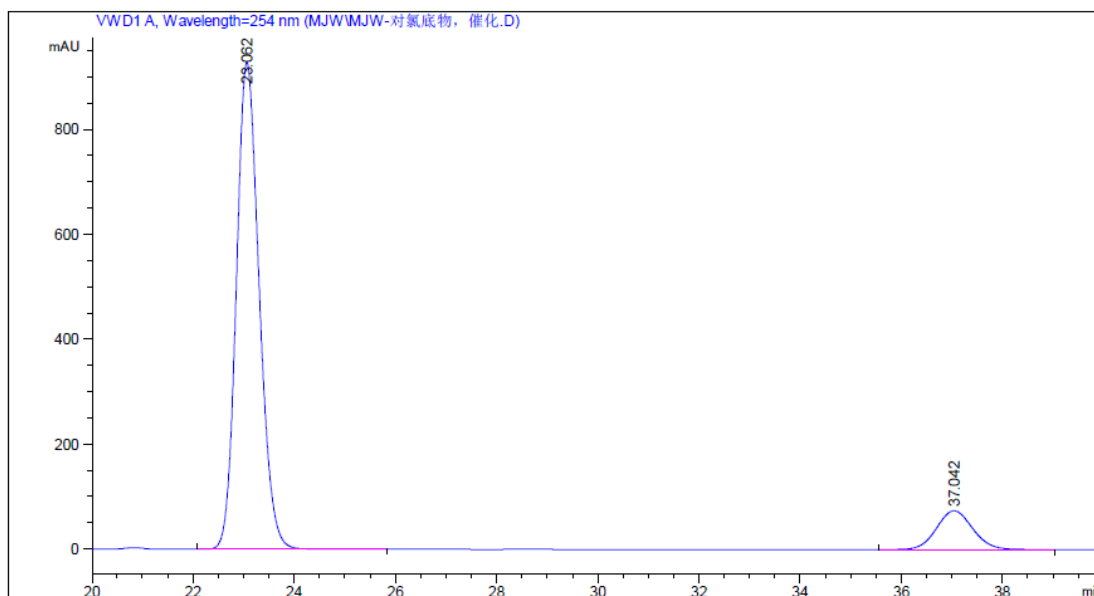

面积百分比报告

排序 : 信号  
 乘积因子 : 1.0000  
 稀释因子 : 1.0000  
 内标使用乘积因子和稀释因子

信号 1: VWD1 A, Wavelength=254 nm

| 峰 # | 保留时间 [min] | 类型 | 峰宽 [min] | 峰面积 [mAU*s] | 峰高 [mAU]  | 峰面积 %   |
|-----|------------|----|----------|-------------|-----------|---------|
| 1   | 23.062     | BB | 0.4827   | 2.90311e4   | 928.73175 | 88.8806 |
| 2   | 37.042     | BB | 0.7682   | 3631.92163  | 73.53185  | 11.1194 |

**(R)-dimethyl 2-(cyclohex-2-en-1-yl)malonate (12)**

Colorless oil; yield =51%; ee = 91%;  $^1\text{H}$  NMR (400 MHz,  $\text{CDCl}_3$ )  $\delta$  5.78 (ddd,  $J$  = 9.7, 5.9, 3.6 Hz, 1H), 5.52 (dd,  $J$  = 10.2, 2.0 Hz, 1H), 3.74 (d,  $J$  = 1.6 Hz, 6H), 3.29 (d,  $J$  = 9.5 Hz, 1H), 2.98-2.83 (m, 1H), 1.99 (qd,  $J$  = 7.3, 4.2 Hz, 2H), 1.85-1.65 (m, 2H), 1.60-1.54 (m, 1H), 1.41-1.33 (m, 1H); (Chiralpak AS-H column, 230 nm, 95:5 hexane/isopropanol, flow = 1.0 mL/min)  $t_R$  = 6.1 min, 7.1 min.

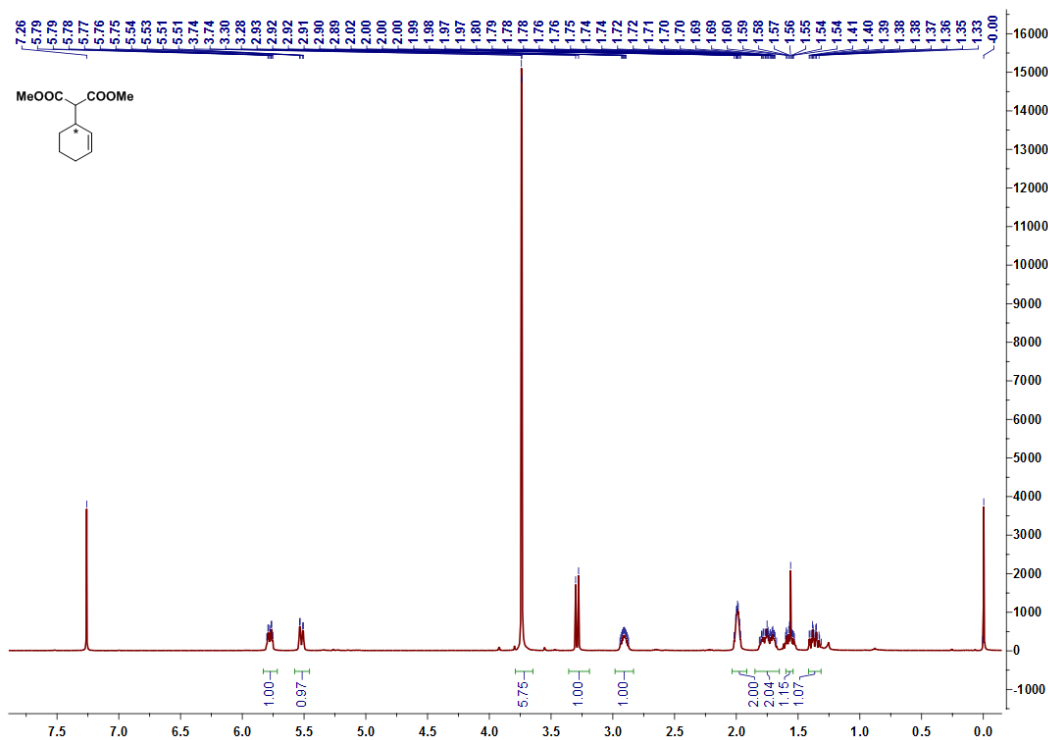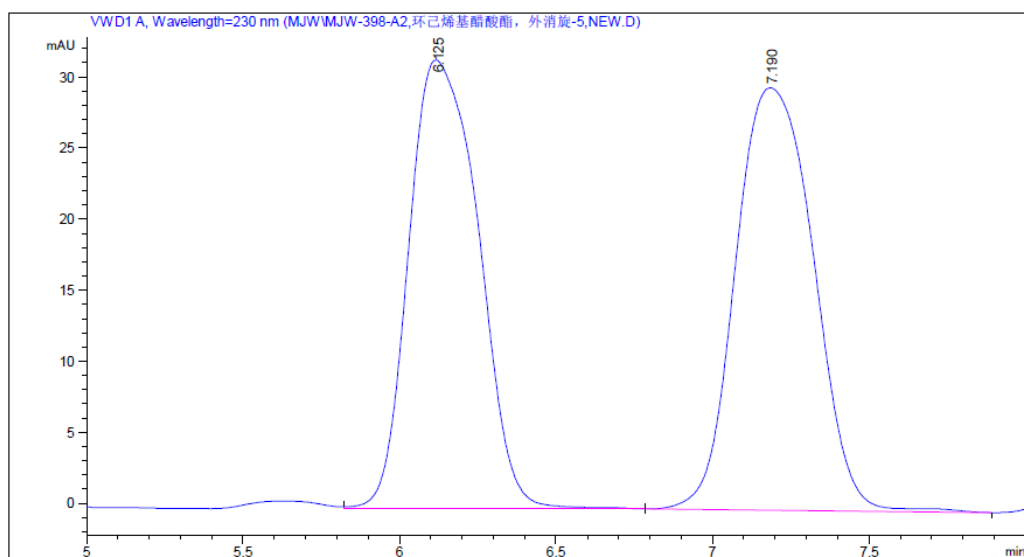

# 面积百分比报告

排序 : 信号  
乘积因子 : 1.0000  
稀释因子 : 1.0000  
内标使用乘积因子和稀释因子

信号 1: VWD1 A, Wavelength=230 nm

| 峰 # | 保留时间 [min] | 类型 | 峰宽 [min] | 峰面积 [mAU*s] | 峰高 [mAU] | 峰面积 %   |
|-----|------------|----|----------|-------------|----------|---------|
| 1   | 6.125      | VB | 0.2530   | 489.27914   | 31.53961 | 48.7146 |
| 2   | 7.190      | BB | 0.2823   | 515.10028   | 29.70126 | 51.2854 |

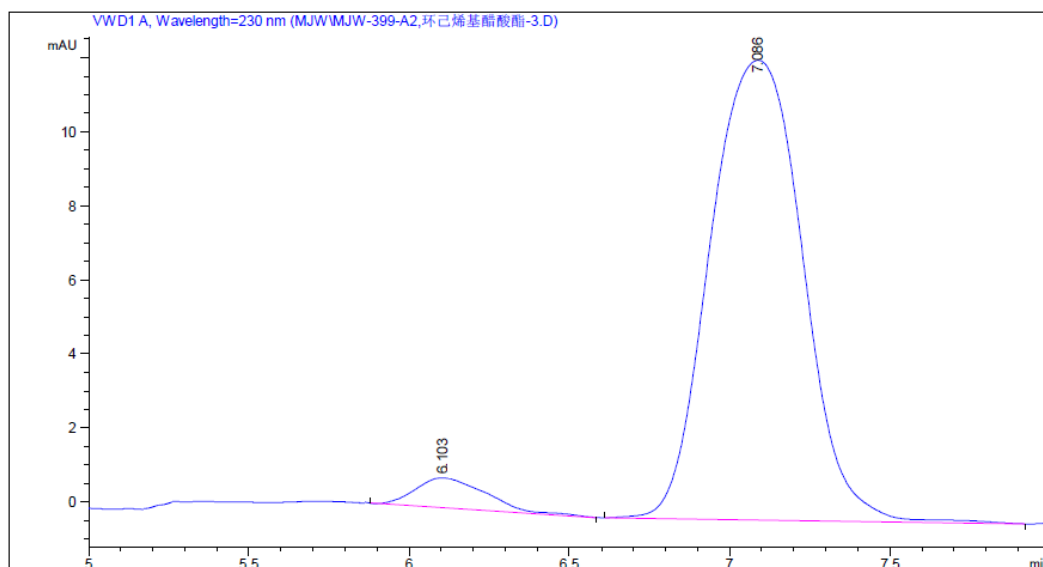

面积百分比报告

排序 : 信号  
 乘积因子 : 1.0000  
 稀释因子 : 1.0000  
 内标使用乘积因子和稀释因子

信号 1: VWD1 A, Wavelength=230 nm

| 峰 # | 保留时间 [min] | 类型 | 峰宽 [min] | 峰面积 [mAU*s] | 峰高 [mAU]   | 峰面积 %   |
|-----|------------|----|----------|-------------|------------|---------|
| 1   | 6.103      | MM | 0.2569   | 12.29001    | 7.97349e-1 | 4.7012  |
| 2   | 7.086      | BB | 0.3224   | 249.13376   | 12.40039   | 95.2988 |

**(*R,E*)-dimethyl 2-(1-(naphthalen-2-yl)-3-(p-tolyl)allyl)malonate (14a) and (*R,E*)-dimethyl 2-(3-(naphthalen-2-yl)-1-(p-tolyl)allyl)malonate (14b)**

Colorless oil; yield = 65%; **14a:14b** = 41:59 and 87%/70% ee; <sup>1</sup>H NMR (400 MHz, CDCl<sub>3</sub>) δ 7.82-7.07 (m, 20H, 17a+17b), 6.63 (d, *J* = 16 Hz, 1H, 17a), 6.51-6.32 (m, 3H, 17a+17b), 4.43 (t, 1H, 17b), 4.29 (t, 1H, 17a), 4.08 (d, *J* = 12 Hz, 1H, 17b), 3.98 (d, *J* = 12 Hz, 1H, 17a), 3.76-3.70 (m, 12H, 17a+17b), 2.32-2.30 (m, 6H, 17a+17b); (Chiralpak AD-H column, 254 nm, 94:6 hexane/isopropanol, flow = 0.5 mL/min) 17a: t<sub>R</sub> = 43.7 min, 61.2 min; 17b: t<sub>R</sub> = 39.4 min, 67.9 min.

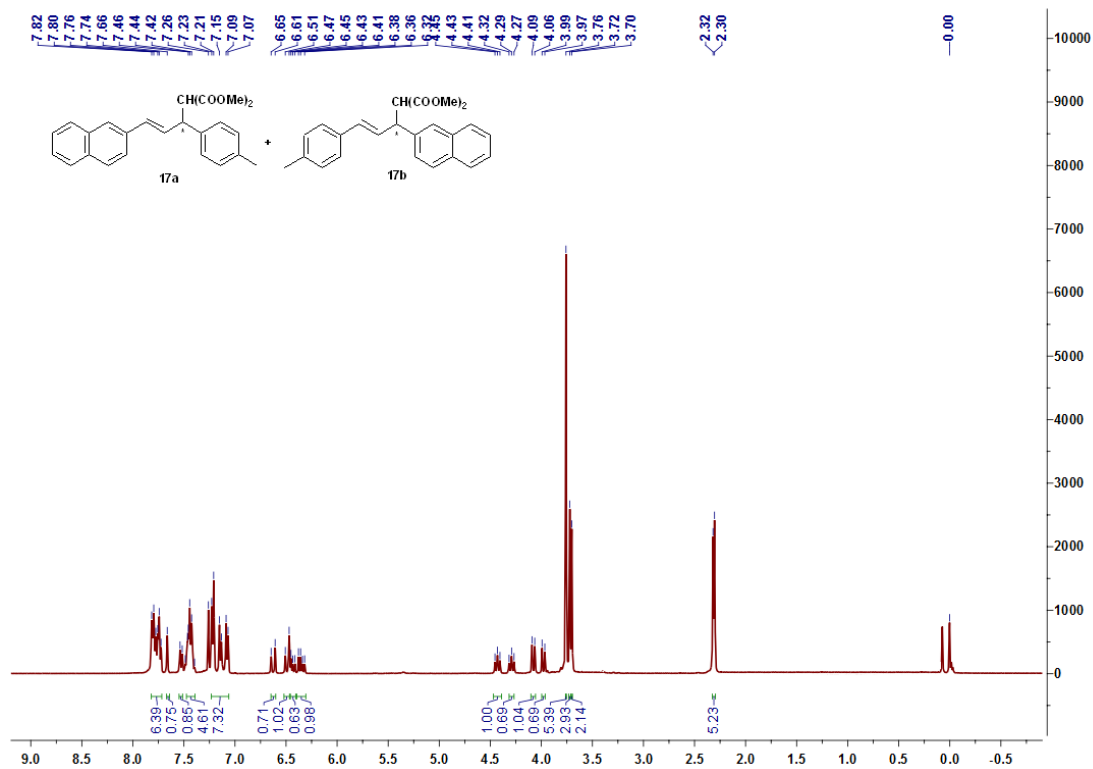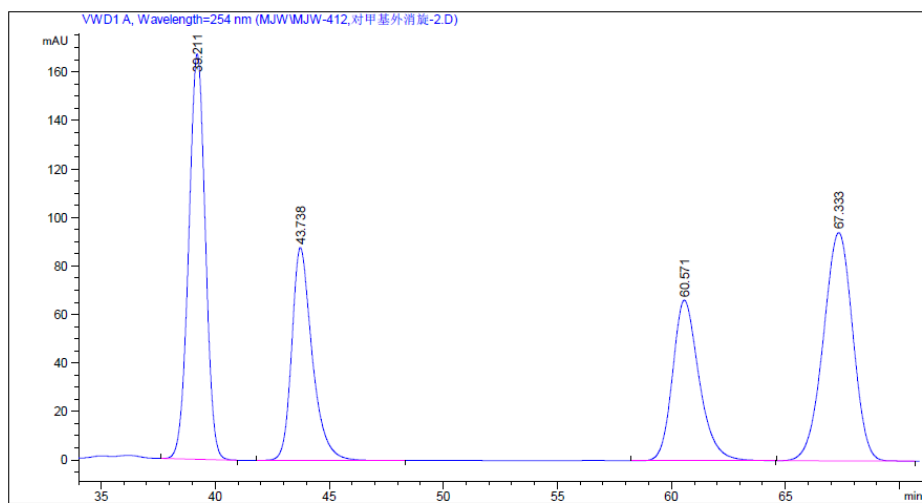

# 面积百分比报告

排序 : 信号  
 乘积因子 : 1.0000  
 稀释因子 : 1.0000  
 内标使用乘积因子和稀释因子

信号 1: VWD1 A, Wavelength=254 nm

| 峰 # | 保留时间 [min] | 类型  | 峰宽 [min] | 峰面积 [mAU*s] | 峰高 [mAU]  | 峰面积 %   |
|-----|------------|-----|----------|-------------|-----------|---------|
| 1   | 39.211     | BB  | 0.8001   | 8469.91406  | 166.88069 | 30.5642 |
| 2   | 43.738     | BB  | 0.9514   | 5456.64502  | 87.51402  | 19.6906 |
| 3   | 60.571     | BB  | 1.2330   | 5360.91504  | 66.18493  | 19.3452 |
| 4   | 67.333     | BBA | 1.4133   | 8424.42090  | 94.02234  | 30.4000 |



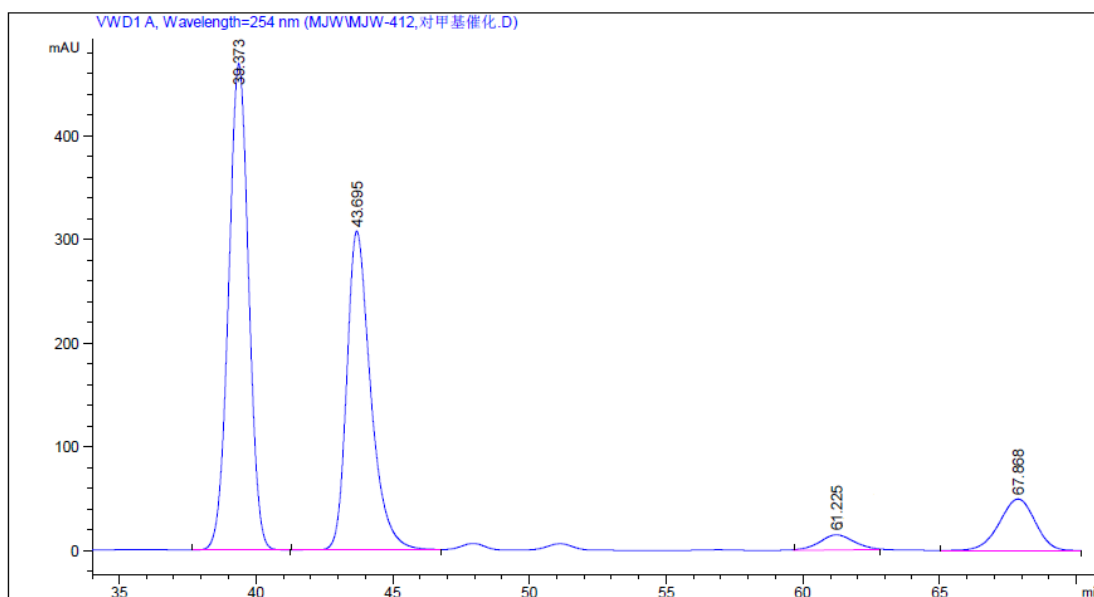

面积百分比报告

排序 : 信号  
乘积因子 : 1.0000  
稀释因子 : 1.0000  
内标使用乘积因子和稀释因子

信号 1: VWD1 A, Wavelength=254 nm

| 峰 # | 保留时间 [min] | 类型  | 峰宽 [min] | 峰面积 [mAU*s] | 峰高 [mAU]  | 峰面积 %   |
|-----|------------|-----|----------|-------------|-----------|---------|
| 1   | 39.373     | BB  | 0.8030   | 2.39089e4   | 468.82605 | 49.4811 |
| 2   | 43.695     | BV  | 0.9176   | 1.86894e4   | 307.26947 | 38.6790 |
| 3   | 61.225     | MM  | 1.4390   | 1255.51611  | 14.54173  | 2.5984  |
| 4   | 67.868     | VBA | 1.4212   | 4465.45264  | 49.46382  | 9.2415  |

**(*R,E*)-dimethyl 2-(1-phenyl-3-(thiophen-2-yl)allyl)malonate (16a) and (*R,E*)-dimethyl 2-(3-phenyl-1-(thiophen-2-yl)allyl)malonate (16b)**

Colorless oil; yield = 60%; **16a:16b** = 28:72 and 89%/62% ee; <sup>1</sup>H NMR (400 MHz, CDCl<sub>3</sub>) δ 7.35-7.18 (m, 12H, 19a+19b), 6.95 (m, 1H, 19a), 6.56 (m, 1H, 19b), 6.38 (m, 1H, 19b), 6.34 (m, 1H, 19a), 4.57 (t, 1H, 19b), 4.22 (t, 1H, 19a), 3.93 (d, *J* = 8 Hz, 2H, 19a+19b), 3.72-3.51 (m, 8H, 19a+19b); (Chiralpak AD-H column, 254 nm, 90:10 hexane/isopropanol, flow = 0.8 mL/min) 19a: *t<sub>R</sub>* = 15.1 min, 23.6 min; 19b: *t<sub>R</sub>* = 13.6 min, 18.1 min.

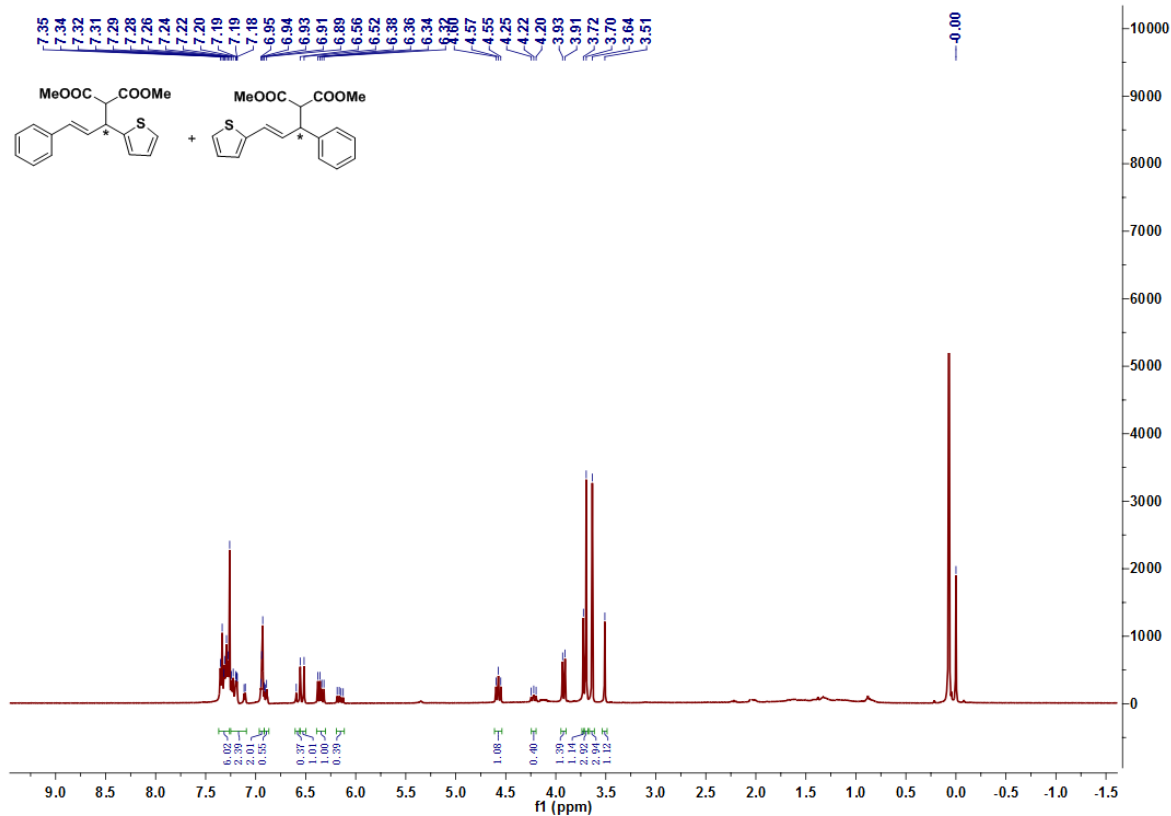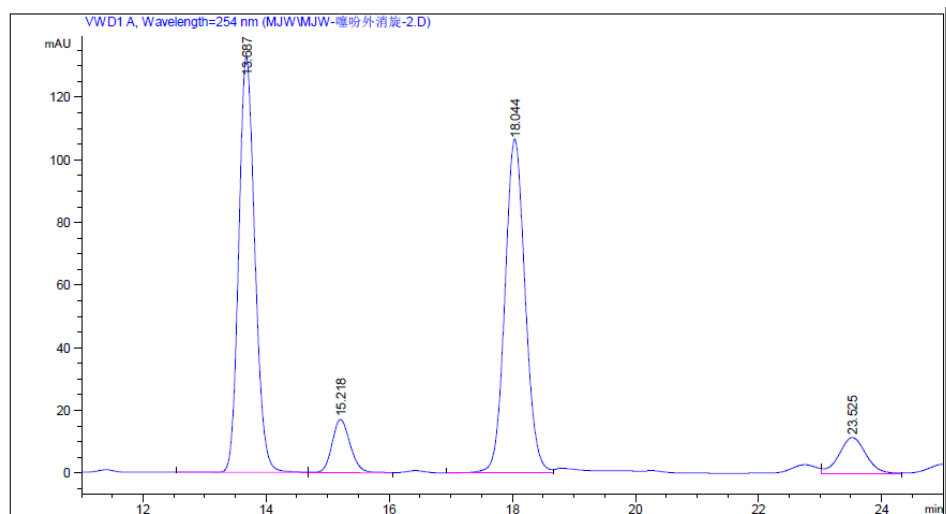

# 面积百分比报告

排序 : 信号  
乘积因子 : 1.0000  
稀释因子 : 1.0000  
内标使用乘积因子和稀释因子

信号 1: VWD1 A, Wavelength=254 nm

| 峰 # | 保留时间 [min] | 类型 | 峰宽 [min] | 峰面积 [mAU*s] | 峰高 [mAU]  | 峰面积 %   |
|-----|------------|----|----------|-------------|-----------|---------|
| 1   | 13.687     | BV | 0.2944   | 2419.82568  | 131.69771 | 43.6490 |
| 2   | 15.218     | VV | 0.3378   | 347.68283   | 16.77871  | 6.2715  |
| 3   | 18.044     | BV | 0.3806   | 2434.70313  | 105.77067 | 43.9173 |
| 4   | 23.525     | VV | 0.4798   | 341.62253   | 11.32827  | 6.1622  |

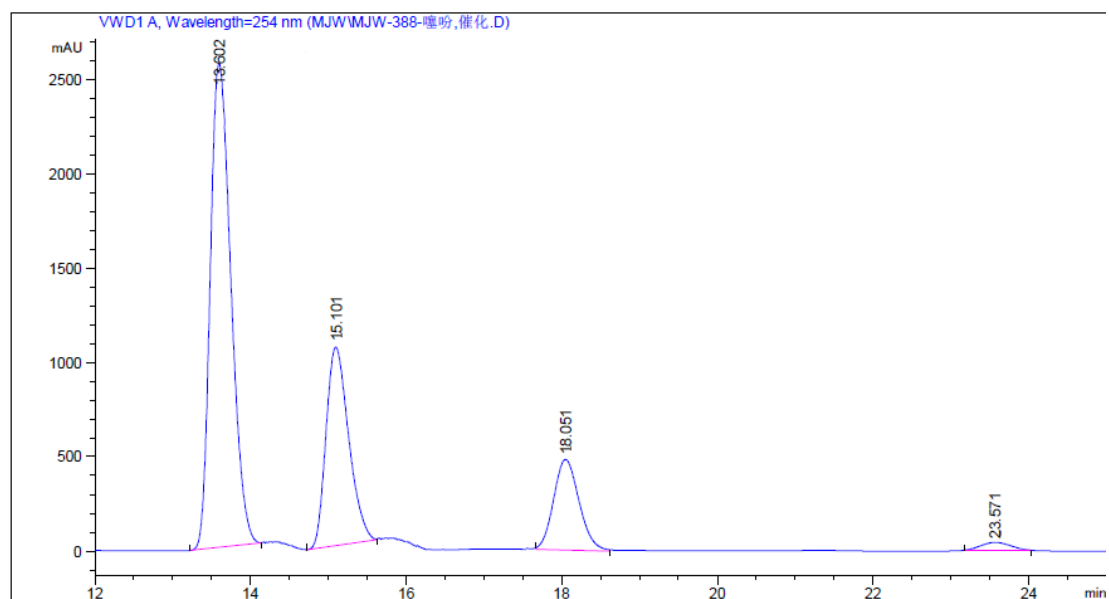

面积百分比报告

排序 : 信号  
 乘积因子 : 1.0000  
 稀释因子 : 1.0000  
 内标使用乘积因子和稀释因子

信号 1: VWD1 A, Wavelength=254 nm

| 峰 # | 保留时间 [min] | 类型 | 峰宽 [min] | 峰面积 [mAU*s] | 峰高 [mAU]   | 峰面积 %   |
|-----|------------|----|----------|-------------|------------|---------|
| 1   | 13.602     | MM | 0.3047   | 4.71931e4   | 2581.50293 | 58.5100 |
| 2   | 15.101     | MM | 0.3352   | 2.13265e4   | 1060.42212 | 26.4406 |
| 3   | 18.051     | MM | 0.3775   | 1.09333e4   | 482.71359  | 13.5551 |
| 4   | 23.571     | MM | 0.4554   | 1205.33447  | 44.11488   | 1.4944  |

**(*R,E*)-*N*-Benzyl-1,3-diphenylprop-2-en-1-amine (18a)**

Yellow oil; yield: 45%; ee: 87%; <sup>1</sup>H NMR (400 MHz, CDCl<sub>3</sub>) δ 7.45-7.21 (m, 15H), 6.58 (d, *J* = 15.9 Hz, 1H), 6.32 (dd, *J* = 15.8, 7.4 Hz, 1H), 4.40 (d, *J* = 7.4 Hz, 1H), 3.80 (s, 2H); HPLC (Chiralpak AD-H column, 254 nm, 90:10 hexane/isopropanol, flow = 0.5mL/min) *t*<sub>R</sub> = 14.7min, 15.8min.

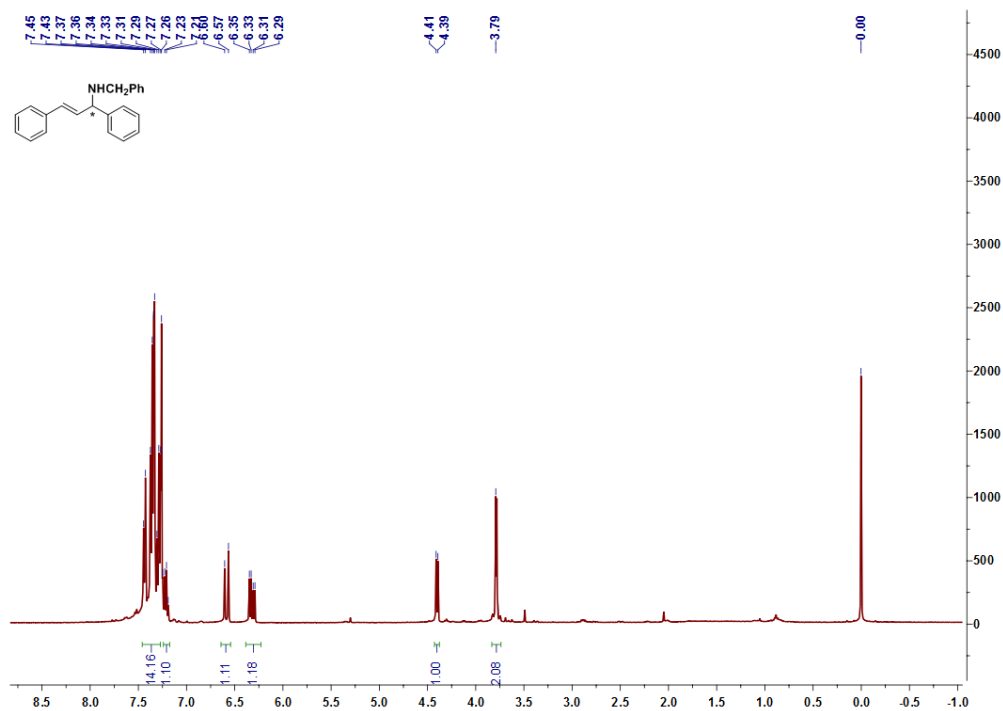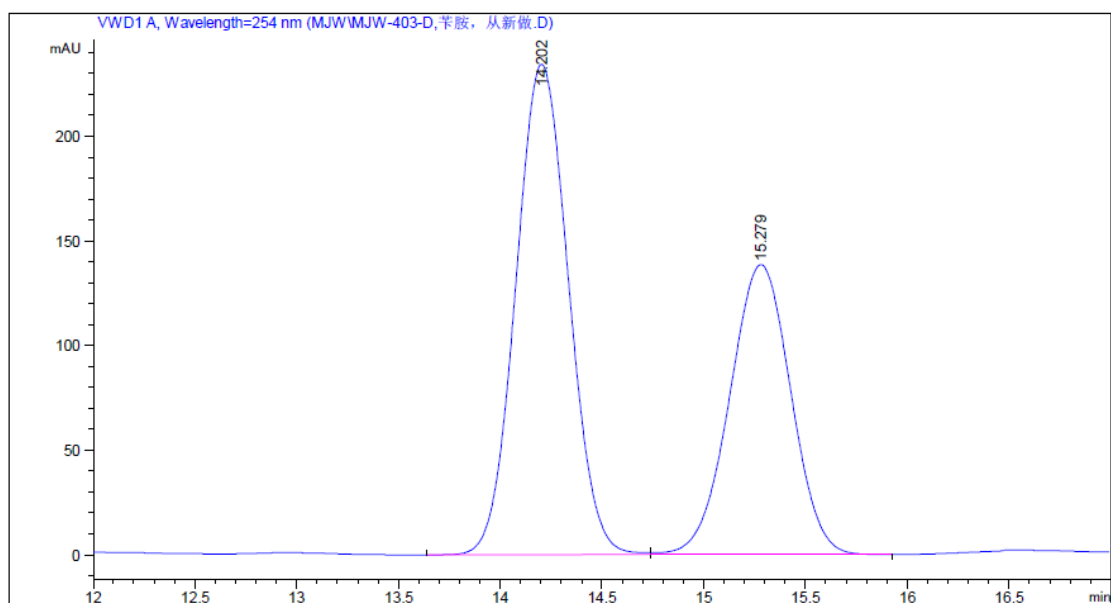

# 面积百分比报告

排序 : 信号  
 乘积因子 : 1.0000  
 稀释因子 : 1.0000  
 内标使用乘积因子和稀释因子

信号 1: VWD1 A, Wavelength=254 nm

| 峰 # | 保留时间 [min] | 类型 | 峰宽 [min] | 峰面积 [mAU*s] | 峰高 [mAU]  | 峰面积 %   |
|-----|------------|----|----------|-------------|-----------|---------|
| 1   | 14.202     | BV | 0.2828   | 4215.23877  | 234.45152 | 59.2905 |
| 2   | 15.279     | VB | 0.3266   | 2894.22461  | 138.61351 | 40.7095 |

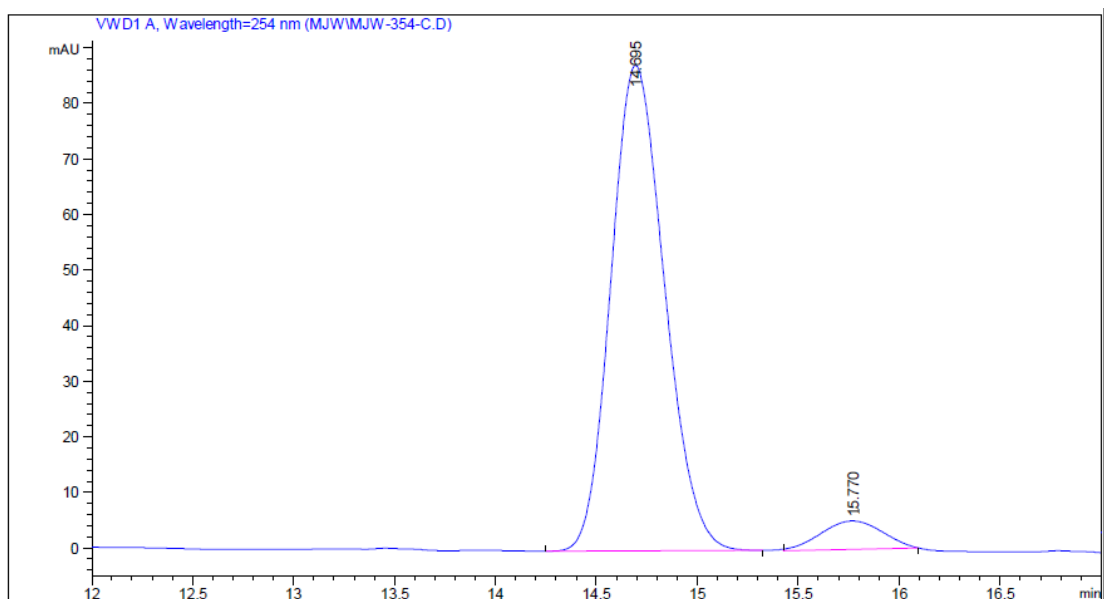

=====  
 面积百分比报告  
 =====

排序 : 信号  
 乘积因子 : 1.0000  
 稀释因子 : 1.0000  
 内标使用乘积因子和稀释因子

信号 1: VWD1 A, Wavelength=254 nm

| 峰 # | 保留时间 [min] | 类型 | 峰宽 [min] | 峰面积 [mAU*s] | 峰高 [mAU] | 峰面积 %   |
|-----|------------|----|----------|-------------|----------|---------|
| 1   | 14.695     | BB | 0.2875   | 1613.95886  | 87.37426 | 93.7341 |
| 2   | 15.770     | MM | 0.3520   | 107.88851   | 5.10767  | 6.2659  |

**(*R,E*)- N- 1,3-Diphenylprop-2-enyl] morpholine (18b)**

White solid; yield: 72%; ee: 55%; <sup>1</sup>H NMR (400 MHz, CDCl<sub>3</sub>) δ 7.41-7.26 (m, 10H), 6.57 (d, *J* = 15.8 Hz, 1H), 6.28 (dd, *J* = 15.8, 8.9 Hz, 1H), 3.78 (d, *J* = 8.9 Hz, 1H), 3.71 (t, *J* = 4.6 Hz, 4H), 2.53-2.36 (m, 4H); HPLC (Chiralpak OD-H column, 254 nm, 90:10 hexane/isopropanol, flow =1mL/min) t<sub>R</sub> = 6.7min, 12.9min..

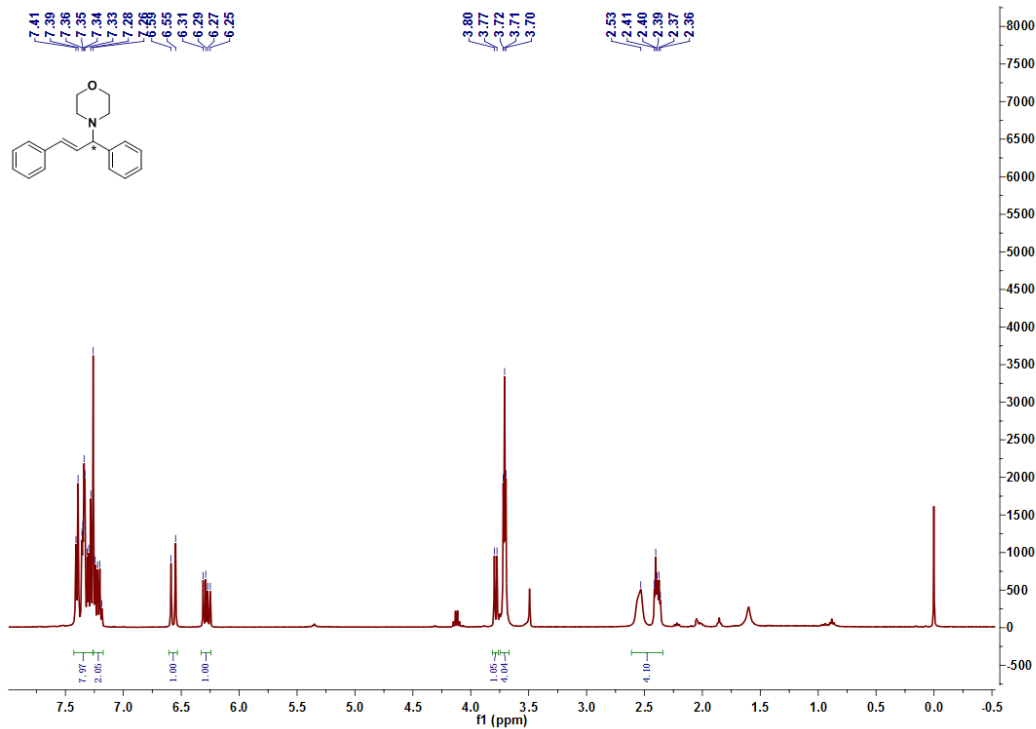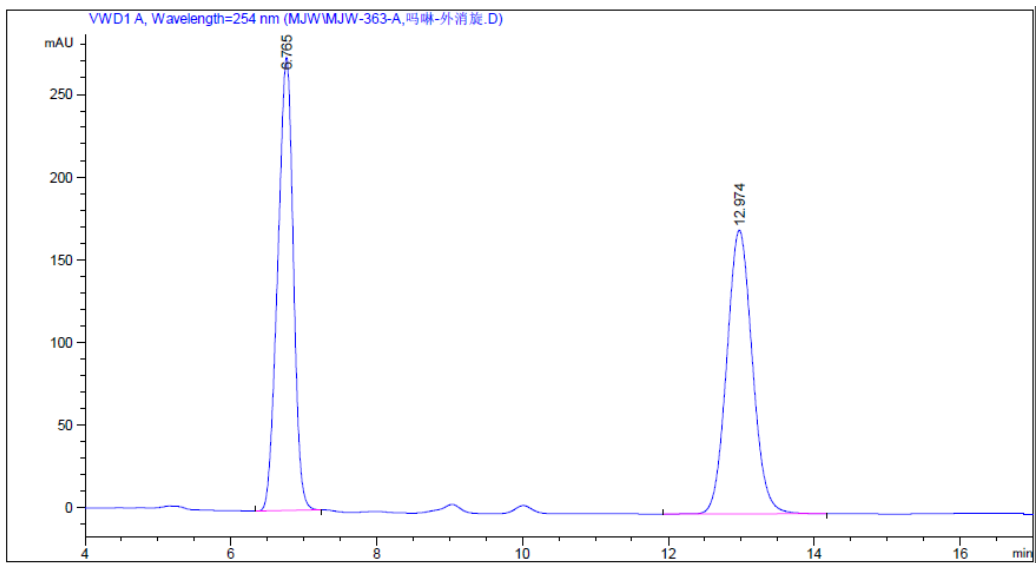

# 面积百分比报告

排序 : 信号  
 乘积因子 : 1.0000  
 稀释因子 : 1.0000  
 内标使用乘积因子和稀释因子

信号 1: VWD1 A, Wavelength=254 nm

| 峰 # | 保留时间 [min] | 类型 | 峰宽 [min] | 峰面积 [mAU*s] | 峰高 [mAU]  | 峰面积 %   |
|-----|------------|----|----------|-------------|-----------|---------|
| 1   | 6.765      | BB | 0.2263   | 4070.60767  | 273.96298 | 49.4049 |
| 2   | 12.974     | BB | 0.3767   | 4168.67432  | 171.40359 | 50.5951 |

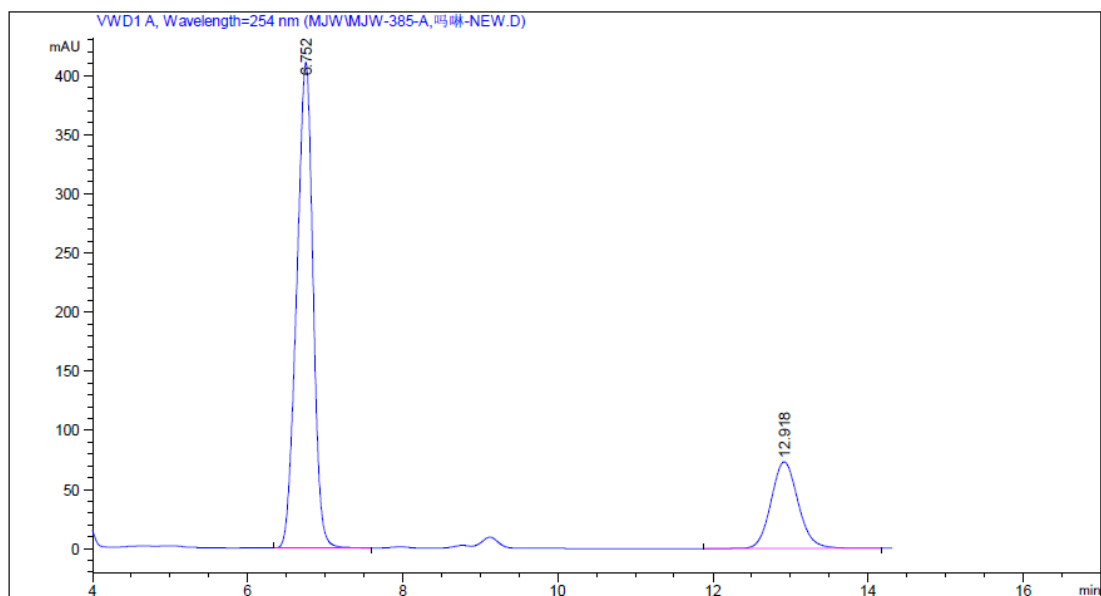

面积百分比报告

排序 : 信号  
 乘积因子 : 1.0000  
 稀释因子 : 1.0000  
 内标使用乘积因子和稀释因子

信号 1: VWD1 A, Wavelength=254 nm

| 峰 # | 保留时间 [min] | 类型 | 峰宽 [min] | 峰面积 [mAU*s] | 峰高 [mAU]  | 峰面积 %   |
|-----|------------|----|----------|-------------|-----------|---------|
| 1   | 6.752      | VB | 0.2222   | 5992.45020  | 410.64621 | 77.1689 |
| 2   | 12.918     | BB | 0.3746   | 1772.92358  | 73.18202  | 22.8311 |

**(*R,E*)- (1,3-diphenylallyl)-(4-methoxyphenyl) amine (18c)**

pale yellow solid; yield: 16%; ee: 74%;  $^1\text{H}$  NMR (400 MHz,  $\text{CDCl}_3$ )  $\delta$  7.44-7.26 (m, 10H), 6.75-6.73 (m, 2H), 6.65-6.59 (m, 3H), 6.39 (dd,  $J = 15.8, 6.3$  Hz, 1H), 5.01 (d,  $J = 6.3$  Hz, 1H), 3.88 (s, 1H), 3.72 (s, 3H). (Chiralcel OD-H, 254 nm, 90:10 hexane/isopropanol, flow = 0.5 mL/min)  $t_R = 32.3$  min, 37.2 min.

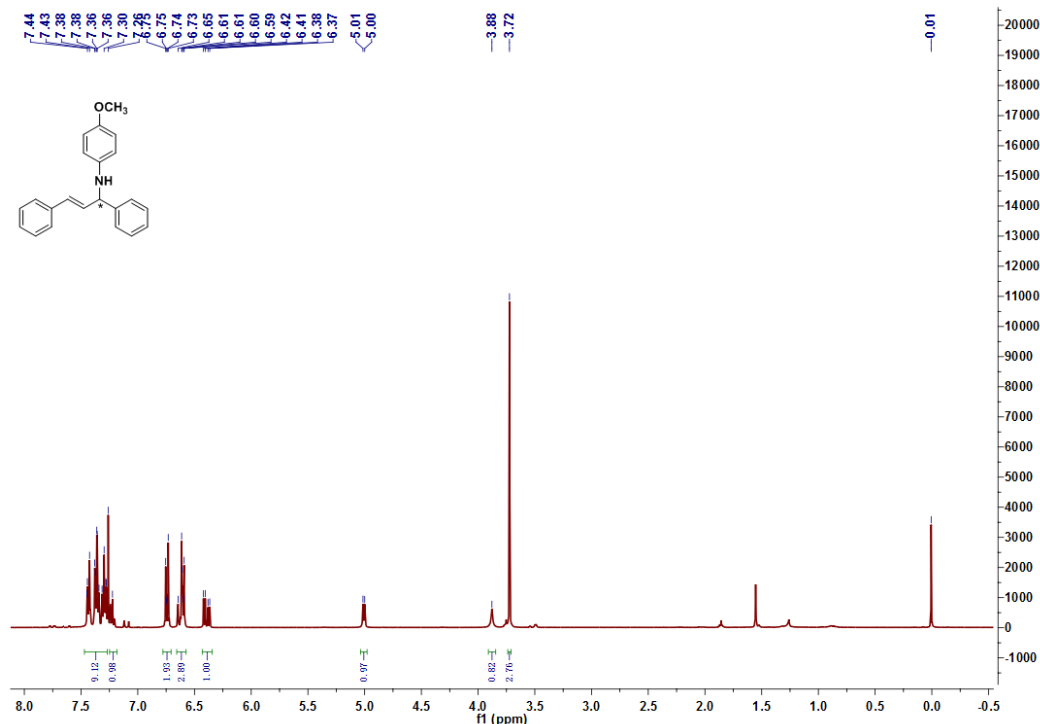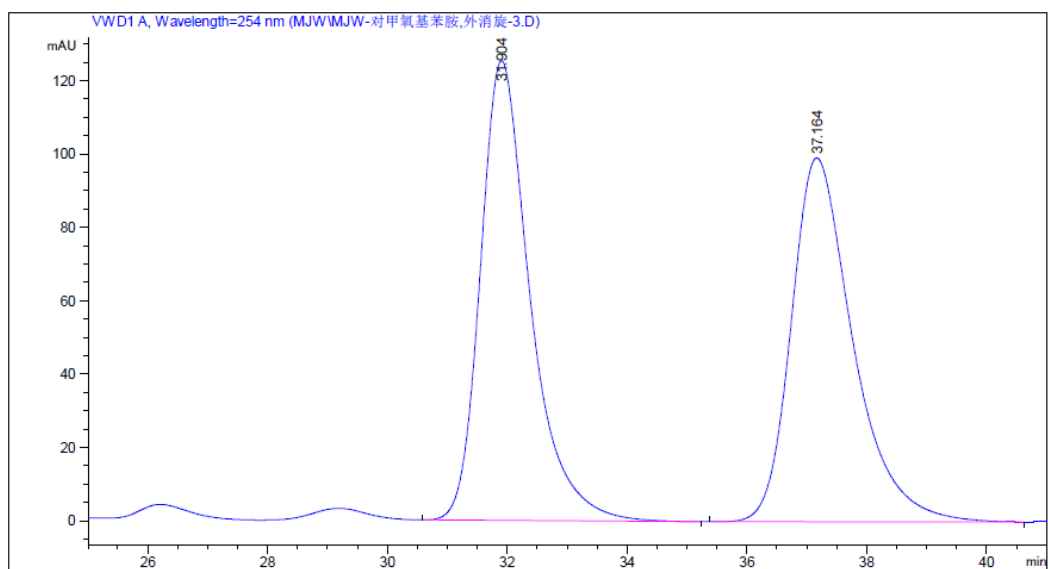

# 面积百分比报告

排序 : 信号  
 乘积因子 : 1.0000  
 稀释因子 : 1.0000  
 内标使用乘积因子和稀释因子

信号 1: VWD1 A, Wavelength=254 nm

| 峰 # | 保留时间 [min] | 类型 | 峰宽 [min] | 峰面积 [mAU*s] | 峰高 [mAU]  | 峰面积 %   |
|-----|------------|----|----------|-------------|-----------|---------|
| 1   | 31.904     | BB | 0.8679   | 7229.99414  | 125.35849 | 50.4905 |
| 2   | 37.164     | BB | 1.0807   | 7089.52881  | 99.20995  | 49.5095 |



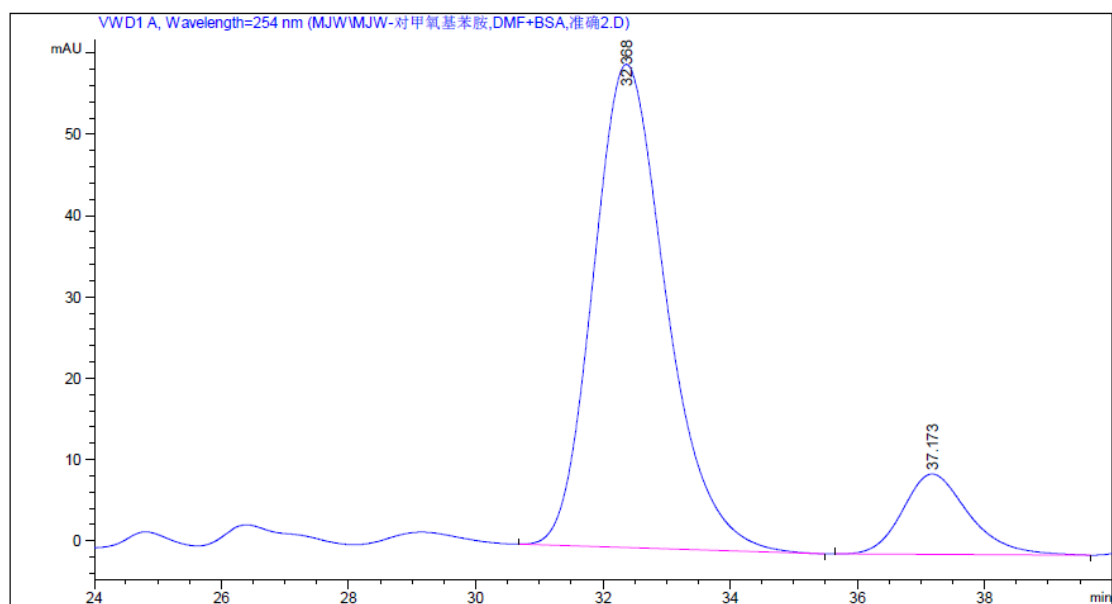

=====  
 面积百分比报告  
 =====

排序 : 信号  
 乘积因子 : 1.0000  
 稀释因子 : 1.0000  
 内标使用乘积因子和稀释因子

信号 1: VWD1 A, Wavelength=254 nm

| 峰 # | 保留时间 [min] | 类型 | 峰宽 [min] | 峰面积 [mAU*s] | 峰高 [mAU] | 峰面积 %   |
|-----|------------|----|----------|-------------|----------|---------|
| 1   | 32.368     | BB | 1.2151   | 4744.59766  | 59.44941 | 86.9361 |
| 2   | 37.173     | BB | 1.0512   | 712.97076   | 9.88814  | 13.0639 |

## References

- 1 W. Chen, W. Mbafor, S. M. Roberts and J. Whittall, *Tetrahedron: Asymmetry*, 2006, **17**, 1161.
